21

## 22 **Abstract**

23           Dyscalculia, a specific learning disability that impacts arithmetical skills, has  
24 previously been associated to a deficit in the precision of the system that estimates the  
25 approximate number of objects in visual scenes (the so called 'number sense' system).  
26 However, because in tasks involving numerosity comparisons dyscalculics' judgements  
27 appears disproportionately affected by continuous quantitative dimensions (such as the size of  
28 the items), an alternative view linked dyscalculia to a domain-general difficulty in inhibiting  
29 task-irrelevant responses.

30           To arbitrate between these views, we evaluated the degree of reciprocal interference  
31 between numerical and non-numerical quantitative dimensions in adult dyscalculics and  
32 matched controls. We used a novel stimulus set orthogonally varying in mean item size and  
33 numerosity, putting particular attention into matching both features' perceptual  
34 discriminability. Participants compared those stimuli based on each of the two dimensions.  
35 While control subjects showed no significant size interference when judging numerosity,  
36 dyscalculics' numerosity judgments were strongly biased by the unattended size dimension.  
37 Importantly however, both groups showed the same degree of interference from number  
38 when judging mean size. Moreover, only the ability to discard the irrelevant size information  
39 when comparing numerosity (but not the reverse) significantly predicted calculation ability  
40 across subjects.

41           Overall, our results show that numerosity discrimination is less prone to interference  
42 than discrimination of another quantitative feature (mean item size) when the perceptual  
43 discriminability of these features is matched, as here in control subjects. By quantifying, for  
44 the first time, dyscalculic subjects' degree of interference on another orthogonal dimension of  
45 the same stimuli, we are able to exclude a domain-general inhibition deficit as explanation for  
46 their poor / biased numerical judgement. We suggest that enhanced reliance on non-  
47 numerical cues during numerosity discrimination can represent a strategy to cope with a less  
48 precise number sense.

49

50

51           Keywords: Numerical cognition, Numerosity perception, Mean size perception,  
52 Developmental dyscalculia, Inhibitory control

53

## 54 Introduction

55

56 Evaluating how many objects are in a visual image requires disambiguating the  
57 discrete number of items from different continuous quantities, such as total contrast and  
58 luminance, area, density, and so on. A longstanding and influential theory in the field of  
59 numerical cognition proposes that humans are born with a ‘number sense’ (Dehaene, 1997;  
60 for a review see: Nieder, 2016), a phylogenetically ancient ability to make spontaneous and  
61 rapid estimates of the approximate number of objects in a visual scene. However, if  
62 covarying continuous features already provide cues from which numerosity can be inferred,  
63 behavioral performance might not be based on a specific sense of number. Previous  
64 research has addressed this issue by making non-numerical cues uninformative for  
65 numerosity decisions and successfully demonstrated that numbers can still be perceived,  
66 even from very early on in life (Brannon et al., 2004; Cordes and Brannon, 2011, 2011; de  
67 Hevia et al., 2017; Libertus et al., 2014; Piazza et al., 2004; Xu, 2003; Xu and Spelke, 2000).  
68 At the neuronal level, the brain structures found to be most involved in numerosity  
69 representation also seem to code for number independently of other perceptual dimensions.  
70 Indeed both neuroimaging experiments in human adults and children as well as monkey  
71 neurophysiology showed evidence for number-related neural signatures with a considerable  
72 level of generalization across other quantities and independence from low-level factors of the  
73 image (Cantlon et al., 2006; Castaldi et al., 2016; Eger et al., 2009; Fornaciai et al., 2017;  
74 Harvey et al., 2013; Harvey and Dumoulin, 2017; Izard et al., 2008; Nieder, A. et al., 2002;  
75 Nieder and Merten, 2007; Nieder and Miller, 2004; Piazza et al., 2004).

76 Despite much behavioral, neurophysiological and neuroimaging evidence suggesting  
77 that numerosity can be perceived directly through dedicated neuronal mechanisms (for  
78 reviews on the respective fields see: Anobile et al., 2016; Nieder, 2016; Piazza and Eger,  
79 2016), both adults’ and children’s behavioral performance in numerosity tasks is often  
80 strongly affected by different combinations of covarying non-numerical quantities when these  
81 provide information of a direction incongruent with numerosity (Dakin et al., 2011; DeWind et  
82 al., 2015; Gebuis et al., 2009; Gebuis and Reynvoet, 2012a, 2012b; Hurewitz et al., 2006;  
83 Nys and Content, 2012; Ross, 2003; Rousselle et al., 2004; Rousselle and Noël, 2008; Salti  
84 et al., 2016; Sophian and Chu, 2008; Dénes Szűcs et al., 2013; Tokita and Ishiguchi, 2010).  
85 The underlying causes of this behavioral interference are not entirely understood, and  
86 several potential explanatory mechanisms have been proposed. One theory, prevailing in  
87 experimental psychology, is that different features of the stimulus are independently and  
88 automatically extracted, and compete for control of behavior (as in the classical STROOP

89 effect, see for example Barth, 2008; Hurewitz et al., 2006; Nys and Content, 2012; Rousselle  
90 and Noël, 2008). This theory places the origin of interference at the level of the response  
91 selection. Alternatively, it has been proposed that interference may originate at the level of  
92 sensory extraction: models based on the stimulus energy at different spatial scales can yield  
93 non-veridical estimates of the number of items in a display resembling the biases of human  
94 observers (Dakin et al., 2011), and within hierarchical generative networks, interference from  
95 non-numerical quantities has been related to the efficiency of a normalization process  
96 embedded into the extraction of numerosity representations (Cappelletti et al., 2014b;  
97 Stoianov and Zorzi, 2017). Nevertheless, some authors have interpreted interference to  
98 indicate that numerosity is indirectly inferred from a combination of non-numerical  
99 quantitative features (though without specifying which combination of features in detail),  
100 sometimes going as far as to completely deny the existence of a dedicated perceptual  
101 mechanisms for numerosity (for a review see: Leibovich et al., 2016a).

102 It is noteworthy that among the studies that found strong interference of non-  
103 numerical dimensions on numerosity comparison, many required participants to judge rather  
104 difficult numerical ratios, even between 0.9 and 1.1 (DeWind et al., 2015; Nys and Content,  
105 2012; Tokita and Ishiguchi, 2010). Importantly, the strongest interference is usually observed  
106 for the most difficult numerical ratios with a tendency to decrease for the easier comparisons  
107 (Hurewitz et al., 2006; Nys and Content, 2012). It is well-known that comparative judgments  
108 without counting are not perfect but approximate, depending on the ratio of the compared  
109 numbers with a precision that is commonly operationalized by the Weber fraction. It is hence  
110 conceivable that when subjects are required to make decisions close to or beyond the  
111 precision of their numerosity processing system, they would attempt to rely on associated  
112 quantities to solve the task, especially since in everyday life these often provide correlated  
113 information. However, such heuristic use of non-numerical information need not be the only  
114 possibility: even in symbolic number-size interference tasks, which are not limited by  
115 sensory/perceptual precision to the same extent as non-symbolic numerosity, the relative  
116 ratios of difference in the two dimensions predicted whether size interfered with number  
117 (Algom et al., 1996).

118 Despite the important role of relative discriminability and salience of the attended and  
119 unattended dimensions in interference paradigms, studies reporting interference from  
120 continuous dimensions onto non-symbolic numerical judgments have often neglected this  
121 aspect and paired difficult numerical ratios to be compared with often much larger differences  
122 in non-numerical quantities (e.g. Gebuis and Reynvoet, 2012a, 2012b, 2011; Hurewitz et al.,  
123 2006; Tokita and Ishiguchi, 2010). In sum, both the difficulty of the numerical ratio tested as

124 well as the saliency of the unattended dimension with respect to the attended one may have  
125 contributed to the variations in the strength of interference described in the literature.

126 Compared to the wealth of studies on interference from other quantities on  
127 numerosity comparison, relatively fewer studies have investigated interference of numerosity  
128 onto judgement of a non-numerical quantitative dimension, most often total surface area  
129 (Barth, 2008; Hurewitz et al., 2006; Leibovich et al., 2016b; Nys and Content, 2012; Salti et  
130 al., 2016). These studies have to some extent arrived at different conclusions, sometimes  
131 finding that numerosity, and sometimes that area judgement is more subject to interference,  
132 possibly as a consequence of the above mentioned factor of degree of change /  
133 discriminability. Indeed when total surface area was claimed to be dominant over the  
134 numerical dimension, larger changes in the unattended area dimension were used (Hurewitz  
135 et al., 2006; Leibovich et al., 2016b), however when the range of ratio variation across  
136 dimension was physically equated, the opposite conclusion was reached (Nys and Content,  
137 2012; Salti et al., 2016). Indeed the interference arising from numerosity changes in total  
138 surface area comparisons was reported to be either similar or stronger with respect to the  
139 total surface area interference during numerosity judgments, both when testing the subitizing  
140 range (Salti et al., 2016) and much higher numerosities (Nys and Content, 2012). However,  
141 none of these studies took into account the differences that may exist between the  
142 perceptual discriminability of different features, as a result of which using identical physical  
143 ratios across dimensions may not necessarily translate into equating perceptual salience.

144 Several studies have shown that the precision of numerosity discrimination can be  
145 predictive of current and/or future mathematical performance (Anobile et al., 2013b; Anobile  
146 et al., 2016; Chen and Li, 2014; Halberda et al., 2008; Libertus et al., 2011, 2013). At the  
147 lower end of the spectrum, some dyscalculic children have been shown to present  
148 abnormally high numerosity thresholds (Mazzocco et al., 2011; Piazza et al., 2010).  
149 Accordingly, one influential theory posits that numerosity representations are foundational for  
150 higher-level numerical skills and that impairments in these representations may prevent  
151 individuals from understanding the semantic meaning of symbolic numerals, and higher level  
152 arithmetic (Butterworth, 2005; Butterworth et al., 2011; Butterworth and Kovas, 2013;  
153 Dehaene et al., 2003; Landerl et al., 2004). However some authors observed slower and less  
154 accurate responses during digits, but not non-symbolic comparisons in children with  
155 mathematical learning disabilities, and proposed that the source of the difficulties was in  
156 linking number symbols to magnitude representations, rather than in numerosity processing  
157 per se (Rousselle and Noël, 2007).

158           Beyond these core deficit hypotheses, more comprehensive views explain the  
159 heterogeneity of dyscalculia and the normal development of different components of  
160 mathematical cognition by taking into account also domain general cognitive abilities, such  
161 as working memory, attention and inhibition (Cragg and Gilmore, 2014; Fias, 2016; Fias et  
162 al., 2013; Geary and Moore, 2016; Houdé and Tzourio-Mazoyer, 2003; Linzarini et al., 2015;  
163 Menon, 2016; Poirel et al., 2012; Vanbinst et al., 2014; Vanbinst and De Smedt, 2016).

164 In particular, recently it has been suggested that mathematical achievement could be more  
165 related to the ability of the subjects to inhibit responses to task-irrelevant features rather than  
166 to the numerosity acuity itself: Gilmore et al. (2013) found that in typically developing children  
167 the correlation between weber fraction and mathematical skills was significant only when  
168 other quantitative features varied incongruently with number, and that weber fractions were  
169 no longer predictive of calculation ability once separate measures of inhibitory skills were  
170 included. Similarly, the performance of dyscalculic children during non-symbolic numerical  
171 comparisons was reported to be particularly affected by the congruency with other visual  
172 perceptual cues, (Bugden and Ansari, 2016; Szűcs et al., 2013). On the basis of these  
173 findings it has been suggested that the previously described relation between numerosity  
174 discrimination and arithmetic performance across the general population, as well as the  
175 particularly impaired numerosity acuity in some dyscalculic subjects, would not be due to a  
176 dedicated enumeration capacity being foundational as commonly assumed, but to a more  
177 domain-general deficit in executive function and especially inhibitory skills, manifesting as a  
178 poor ability to discard task-irrelevant features during numerosity judgement

179           The aims of the work described in this manuscript were two-fold. First, in normal adult  
180 subjects, we wanted to determine what is the capacity of numerosity to interfere with the  
181 judgement of another quantitative dimension (average item size) and how it compares to the  
182 degree of interference of that feature onto numerosity under conditions of equated perceptual  
183 discriminability. We chose average item size as an intuitive feature which is considered an  
184 explicitly encoded visual dimension, as number and density (Ariely, 2001; Chong and  
185 Treisman, 2005, 2003; Corbett et al., 2012; Sweeny et al., 2015). As summarized previously,  
186 unequal discriminability can affect the degree and direction of interference and merely  
187 equating physical ratios across magnitudes does not necessarily capture subjects'  
188 perceptual sensitivity. Therefore, to determine the intrinsic capacity for interference more  
189 unambiguously, in a pilot study we measured perceptual precision for both average item size  
190 and numerosity in normal subjects, which then allowed us to equate the difficulty of the two  
191 tasks on average across subjects. We asked participants to make comparative judgments  
192 over the same sets but on the basis of either of the two dimensions.

193           Second, to arbitrate between the hypotheses of impaired number acuity versus  
194 domain-general inhibition deficits in dyscalculia we tested a group of adult dyscalculics with  
195 our novel paradigm. Having access to adult dyscalculics allowed us to extensively test them  
196 with different tasks and a large number of trials, enabling robust and fine-grained  
197 psychophysical measures that are much harder to obtain in children. Comparing dyscalculic  
198 participants' performance with an age and IQ matched control group on average item size, in  
199 addition to numerosity discrimination, allowed us to directly evaluate, for the first time, the  
200 hypothesis according to which dyscalculia is associated to a general deficit of inhibitory  
201 control. If dyscalculics suffered from a generalized inhibition impairment and no domain  
202 specific number sense deficit, we would expect them to present stronger interference than  
203 the control group irrespective of the task-relevant dimension (numerosity or average item  
204 size). On the contrary, if decreased precision and / or enhanced interference in the  
205 dyscalculic compared to the control group was found only during the numerosity task but not  
206 during the average size task, this would refute the domain-general view and be more  
207 compatible with a domain-specific deficit in numerosity representation.

208

## 209 **Methods**

### 210 **Subjects**

211           Fifteen adults without mathematical impairment and ten adults with mathematical  
212 impairment participated in the study. Contacts with math impaired subjects were provided by  
213 our speech therapist collaborator to whom participants referred during childhood or adult age  
214 for evaluation. To be included in the dyscalculic group participants were required to (a) have  
215 been diagnosed with dyscalculia by a neuropsychologist or speech therapist during  
216 childhood or have suffered from major difficulty with math since very early in school; (b) to  
217 claim that the math difficulty interfered with their everyday life and career choice; (c) present  
218 no neurological disorder; (d) have completed at least secondary level education.

219           Participants included in the control group were required to (a) have had no difficulty  
220 learning mathematic, reading, writing and orthography during school; (b) not have any  
221 neurological disorder; (c) have at least secondary level education.

222           All subjects underwent an extensive neuropsychological assessment where indices of  
223 verbal and non-verbal intelligence, verbal and visuospatial working memory, reading abilities,  
224 inhibitory skills and mathematical performance were measured, to objectify differences in

225 mathematical abilities and compare performance of the groups across more general  
226 domains.

227 One subject who initially claimed not to have any mathematical difficulties was  
228 excluded from the experiment because his/her performance was more than 2 standard  
229 deviations below the group mean for both intelligence indices and for more than one test  
230 measuring different components of mathematical abilities. Therefore fourteen adults in the  
231 control group (C group, age  $29\pm 7$ ) and ten adults in the dyscalculic group (D group, age  
232  $28\pm 11$ ) were included in the main experiment.

233 All participants signed the informed consent. This study was conducted in accordance  
234 with the Declaration of Helsinki and under the general ethics protocol covering human  
235 research at Neurospin (Gif-sur-Yvette, France). The study was reviewed and approved by an  
236 institutional review board (ethics committee) before the study began (it received authorization  
237 from the CPP IDF 7 number 15 007 on May the 28th 2015 and from the Agence du  
238 Médicament on February the 13th 2015).

239

## 240 **Neuropsychological Assessment**

241 The neuropsychological evaluation started with an anamnestic interview where the  
242 compliance with the inclusion criteria was verified for each participant.

243 After the interview, all subjects underwent neuropsychological testing. As a measure  
244 of verbal and non-verbal IQ, we selected two representative subtests of the Wechsler Adult  
245 Intelligence Scale IV edition (WAIS-IV): similarities and matrix reasoning, respectively. Verbal  
246 working memory was evaluated by means of the digit span subtest from WAIS-IV, while  
247 visuospatial working memory was measured with the Corsi-Block Tapping test. Reading  
248 abilities were evaluated with the “Alouette”, one of the most widely-used reading tests in  
249 France (Lefavrais, 1967). This is a timed test that requires participants to read aloud a brief  
250 text composed of existing regular and irregular words, arranged in a grammatically plausible  
251 manner within the sentence, but conveying no clear meaning overall.

252 The Stroop-Victoria test adapted for francophone subjects (Bayard et al., 2009) was  
253 administered to measure inhibitory skills, selective attention and processing speed.  
254 Participants were required to spell aloud as quickly as possible the color of the ink of a series  
255 of filled circles, of a list of words (‘mais’, ‘pour’, ‘donc’, ‘quand’, meaning ‘but’, ‘for’, ‘so’,  
256 ‘when’) and of a list of color words (‘jaune’, ‘rouge’, ‘vert’, ‘bleu’, meaning ‘yellow’, ‘red’,  
257 ‘green’, ‘blue’). Importantly the color of the ink used for the color words was always  
258 incongruent with the meaning (for example ‘bleu’ written in red). The interference index is



259 calculated by dividing the time necessary to perform the task with the color words by the time  
260 needed to name the color of circles.

261 Finally, to assess mathematical abilities, subjects were evaluated with parts of the  
262 French battery TEDI Math Grands (Noël and Grégoire, 2015). This battery includes  
263 computerized tests evaluating basic numerical abilities. Accuracy and reaction times were  
264 recorded while the subjects were: 1) estimating the number of briefly presented items within  
265 the subitizing range; 2) comparing two single-digit Arabic numerals; 3) mentally performing  
266 single-digit multiplications and subtractions. Additionally, all the subjects underwent two  
267 subtests taken from the Italian battery for developmental dyscalculia (BDE) specifically  
268 targeting understanding of the semantic meaning of numerals (Biancardi and Nicoletti, 2004).  
269 In the first subtest, the subjects were asked to choose the largest of three vertically arranged  
270 Arabic numerals (one to three digits), while in the second one the subjects had to correctly  
271 place an Arabic numeral (one to four digits) in one of the four possible positions along a  
272 number line. Both of these tests measure response accuracy and overall response speed  
273 and were chosen for targeting the understanding of numerals' semantic associations.  
274 Moreover, these tests were found by previous studies to best correlate with numerosity  
275 discrimination thresholds, compared to tasks evaluating transcoding, memory and  
276 automatization of procedures (Anobile et al., 2013b; Anobile et al., 2016).

277

278

## 279 **Analysis**

280 Referring to standardized norms for adults, we calculated standard scores for the IQ  
281 subtests, for the verbal (digit) and visuospatial working memory and for the Stroop test. For  
282 the reading test we analyzed the time (in seconds) needed to read the proposed text and the  
283 number of errors. For the TEDI-MATH we analyzed the number of items to which subjects  
284 correctly responded and, when measured, the reaction time (in ms) needed to respond.  
285 Because accuracy and reaction time can often inversely trade off with each other, we  
286 reduced the number of measures by calculating the inverse efficacy (IE) score (Collins et al.,  
287 2017). IE score is calculated by dividing, for each participant, the mean RT by the proportion  
288 of correct responses. Results from the multiplication and subtraction test in the TEDI math  
289 were averaged together and the IE score Calculation was computed from the collapsed  
290 measures. As the two BDE tests were addressing the same semantic component of  
291 numeracy, we reduced them to one single value by averaging their scores. Similarly to the  
292 other tests, the IE score was computed.

293 To evaluate differences across groups, we compared the dyscalculic and control  
294 group's performance using independent sample t-tests. These tests were applied to either  
295 the standardized test scores described (for the IQ, memory and Stroop tests) or to the raw  
296 scores in the cases where the norms did not cover the adult age range (in the case of the  
297 math and reading tests). When Levene's test was significant, the corrected value, not  
298 assuming the equality of variances, was reported.

299

## 300 **Psychophysical experiment**

### 301 **Stimuli and procedures**

302 Stimuli consisted in heterogeneous arrays of dots, half black and half white, briefly  
303 presented (200 ms) on a midgray background. Dots were constrained to be at least  $0.25^\circ$   
304 apart from each other, to not overlap with the fixation point and to fall within a virtual circle of  
305 either  $7.6^\circ$  or  $5.8^\circ$  diameter of visual angle. Arrays of dots were designed to be sufficiently  
306 sparse to target the 'number regime' and to avoid the contribution of texture density  
307 processing mechanisms that might come into play when item segregation is not possible  
308 (Anobile et al., 2015, 2013a). Indeed, the largest number of dots displayed within the  
309 smallest total field area at the highest eccentricity yielded a density of  $0.75 \text{ dot/deg}^2$ ,  
310 therefore still falling within the number regime. The sets of dots generated were orthogonally  
311 varying in mean size and numerosity. In different sessions participants were asked to  
312 perform two different tasks. During the 'numerosity task' sessions subjects were asked to  
313 choose which one of two stimuli was more numerous, regardless of the mean size of the  
314 dots. During the 'average size task' sessions instead, subjects were asked to choose the  
315 array containing the dots with the largest average size. Results from a pilot study on eight  
316 subjects were used to estimate the just noticeable distance (JND) on a logarithmic scale for  
317 numerosity (0.15) and average size (0.08, when expressed as a function of average item  
318 diameter change, or 0.15, when expressed as a function of average item area change).  
319 Based on these measurements, we chose the ratios to be compared in each task to be  
320 adapted to each dimension's JND. The unattended dimension was chosen to only take the  
321 most extreme values. In the set of stimuli used for the number discrimination task the arrays  
322 contained 5, 6, 8, 12, 17 and 20 dots (ratios 0.5, 0.6, 0.8, 1.2, 1.7, 2 with respect to the  
323 reference of 10 dots), and these dots could be presented with either small ( $0.25^\circ$ ) or large  
324 ( $0.5^\circ$ ) average diameter. The arrays used for mean size discrimination contained dots with  
325 average diameter of 0.25, 0.27, 0.3, 0.40, 0.46 and 0.5 visual degrees (ratios 0.71, 0.77,  
326 0.86, 1.15, 1.3, 1.4 with respect to the reference of 0.35 visual degrees) presented with either

327 few (5) or many (20) dots. This is equivalent to saying that, expressed in terms of average  
328 item area, we tested 0.05, 0.06, 0.07, 0.13, 0.16 and 0.19 visual square degrees,  
329 corresponding to the same ratios as those tested for numbers (0.5, 0.6, 0.8, 1.2, 1.7, 2). In  
330 both tasks, the test stimuli were compared to a reference stimulus containing 10 dots with  
331  $0.35^\circ$  average item diameter (or 0.1 degree square of average item area) within the same  
332 total field area as the test stimulus.

333 For each array, single dots diameters were derived from a symmetric interval around  
334 the mean size, which was linearly subdivided into as many bins as the number of dots  
335 included in the array. To prevent arrays with larger mean sizes from subjectively appearing to  
336 be composed by less variable dot sizes than the smaller ones, as it was the case when using  
337 a constant interval across all sizes, we scaled the size of the interval with mean size. The  
338 intervals spanned  $\pm 0.09$ ,  $\pm 0.11$ ,  $\pm 0.12$ ,  $\pm 0.15$ ,  $\pm 0.17$ , and  $\pm 0.19$  visual degrees around the  
339 respective mean size. Examples of the stimuli used in the two tasks are shown in Fig 1A.

340 Visual stimuli were presented in a dimly lit room on a 14-inch HP screen monitor with  
341 1024x768 resolution at refresh rate of 60 Hz, viewed binocularly from approximately 60 cm  
342 distance. Stimuli were generated and presented under Matlab 9.0 using PsychToolbox  
343 routines (Brainard, 1997).

344 The order of the two tasks was counter-balanced between subjects with half of the  
345 subjects starting with the numerosity task and the other half with the mean size task. In  
346 different days, the control group was tested with two experiments. The stimuli and tasks were  
347 the same in the two experiments, but in Experiment 1 the stimuli were presented  
348 sequentially, while in Experiment 2 they were presented simultaneously (Fig 1B). The order  
349 of the experiments, i.e. the order of presentation modes (sequential/simultaneous), was  
350 counter-balanced across subjects, with half of the subjects starting with Experiment 1 and  
351 the other half with Experiment 2. During the sequential presentation, the two patches were  
352 presented in the center of the screen one after the other, separated by a 1 s interval. When  
353 presented simultaneously, the two sets of dots appeared centered at 6 degrees of  
354 eccentricity along the horizontal meridian with respect to the central fixation point. Test and  
355 reference stimuli could appear either as first or as second stimulus during the sequential  
356 presentation and to the left or to the right of the fixation point during the simultaneous  
357 presentation. After stimulus presentation the subjects' responses were recorded by button  
358 press. Subjects were instructed to press the left arrow to select the stimulus on the left or the  
359 first stimulus in the simultaneous and sequential presentation respectively, and to press the  
360 right arrow to select the right or the second stimulus.

361 In Experiment 3 we tested the dyscalculic group with the simultaneous presentation  
362 only, in order to minimize short-term memory load.

363 Each session started with instructions and 12 practice trials, after which the  
364 experiment started. Each subject performed three sessions of one task, followed by a pause  
365 and another three sessions of the other task. For each task each one of the 6 comparison  
366 ratios was presented 72 times: 2 unattended magnitudes (small and big during the number  
367 task and five or twenty dots during the size task), 2 possible total field areas, 2 possible  
368 spatial positions/presentation orders with respect to the reference (left-right/first-second)  
369 repeated 3 times in each one of the 3 sessions. A total of 432 trials per task were collected  
370 and used for the analysis in each experiment.

371

## 372 **Analysis**

373 For each subject we quantified the effects of experimental manipulations on response  
374 accuracies as well as on parameters derived from fitting the psychometric functions.

375 To assess the effect of congruency across dimensions as well as the effect of ratios  
376 within dimension, we computed the proportion of errors as a function of the ratio of the  
377 attended dimension after splitting for congruency across dimensions. In the ‘congruent’ trials,  
378 the unattended dimensions varied in the same direction as the attended one with respect to  
379 the reference. On the contrary, in the ‘incongruent’ trials the attended and the unattended  
380 dimensions varied in opposite directions. For example, five small dots and twenty big dots  
381 were classified as ‘congruent’ trials, while five big dots and twenty small dots were classified  
382 as ‘incongruent’ trials. The congruency effect corresponds to more errors for the incongruent  
383 compared to congruent trials.

384 To quantify overall precision in both number and mean size judgments, we computed  
385 the just noticeable difference (JND) for each task, presentation mode and group. The  
386 percentage of test trials with “greater than reference” responses was plotted against the log-  
387 transformed difference between test and reference and fitted with a cumulative Gaussian  
388 function using Psignifit toolbox (<https://github.com/wichmann-lab/psignifit>). The 50% point  
389 estimated the point of subjective equality (PSE), and the difference between the 50% and the  
390 75% points yields the just notable difference (JND).

391 A common way in psychophysics to measure interference is to estimate the response  
392 bias, quantified as the shift of the psychometric curve from the veridical value under different  
393 conditions, and allowing to appreciate the strength and direction (over vs underestimation) of  
394 the influence from the unattended dimension. Therefore, to estimate the bias from the

395 unattended dimension, we fitted the subjects' responses after splitting the entire dataset for  
396 the different magnitudes (small or big) of the unattended dimension: during the mean size  
397 task, the 'unattended small' trials only included arrays containing five dots, while the  
398 'unattended big' trials included only the twenty dot arrays. During the numerosity task, an  
399 equivalent subdivision was made based on small and large mean item size. A systematic  
400 shift of the PSE away from 0 as a function of unattended magnitude would suggest a bias  
401 from the unattended dimension. We calculated for each subject the signed difference  
402 between the two PSE estimates obtained when fitting the data after splitting for the  
403 magnitude of the unattended dimension (small-big). Moreover, since previous studies have  
404 shown that the direction of the bias from the unattended dimension is not necessarily the  
405 same for all subjects (DeWind et al., 2015) and this was also observed in our results, we  
406 computed in addition an unsigned bias, which measures the overall degree of interference  
407 effect irrespective of its direction, by taking the absolute value of the above described  
408 difference in PSE for small and large magnitude of the unattended dimension.

409 Effects of the experimental manipulations on the different measures described were  
410 tested statistically with repeated measures ANOVAs, including group as a between subject  
411 factor when comparing the control and dyscalculic group. In case of significant higher order  
412 interactions between factors, lower order interactions or main effects are not reported.. In  
413 case of significant interactions, post-hoc tests were always performed with adjustments for  
414 multiple comparisons (Bonferroni correction). One sample t-tests were used to test whether  
415 signed biases were significantly different from 0.

416 We further performed correlation analyses based on Pearson correlation, to test for a  
417 relation between the number and size bias with the subject's sensitivity for these properties,  
418 as well as with the mathematical performance defined as IE calculation score, with and  
419 without regressing out the effect of group.

420

## 421 Results

### 422 Neuropsychological Assessment

423 The neuropsychological assessment verified the fulfillment of the inclusion criteria for  
424 all participants. Until recently, dyscalculia was a relatively unknown and underestimated  
425 disorder, therefore it is extremely rare to find adult dyscalculics with an established pre-  
426 existing diagnosis. Yet three of our subjects included in the dyscalculic group had been  
427 diagnosed with dyscalculia during childhood. None of the subjects had any neurological  
428 disorders and they all reported having had access to appropriate education during school-  
429 age. All the subjects had at least secondary level education.

430 Only subjects in the dyscalculic group claimed having had learning difficulties and  
431 major problems in acquiring mathematical skills since the early school years. Despite the fact  
432 that most of them (9 out of 10) had had intensive compensatory training and/or supporting  
433 private lessons, they all affirmed that their deficits continued to persist and to have an impact  
434 on their everyday life. Almost all of these subjects (8 out of 10) reported having at least one  
435 relative with difficulty in either mathematics, reading, writing or orthography. Four subjects in  
436 the dyscalculic and three subjects in the control group were born before the term (five  
437 subjects were born less than one month before the term, one subject in the control group two  
438 months before the term and one subject in the dyscalculic group four months preterm). Two  
439 subjects in each group were left handed.

440 The dyscalculic and control group did not significantly differ in age, verbal and non-  
441 verbal IQ, reading accuracy, verbal working memory and performance in the Color-Stroop  
442 test (all  $p$ -values  $> 0.05$ , see Table 1 for descriptive statistics and tests across groups). The  
443 two groups significantly differed in reading speed ( $t(22) = 2.24$ ,  $p < 0.05$ ), visuo-spatial working  
444 memory ( $t(22) = -4.05$ ;  $p < 0.01$ ), and basic numerical as well as arithmetic tests. In particular,  
445 dyscalculic and control group differed in accuracy in the subitizing task ( $t(22) = -2.61$ ;  $p < 0.01$ )  
446 and in IE scores for digit comparison ( $t(22) = 3.54$ ;  $p < 0.01$ ), and calculation ( $t(22) = 2.30$ ;  
447  $p < 0.05$ ). Detailed results for RTs and accuracy during the individual tasks are listed in Table  
448 1. Dyscalculics were significantly slower in digit comparison ( $t(22) = 3.30$ ;  $p < 0.01$ ) and made  
449 more errors in mental multiplication and subtraction with respect to the control group ( $t(22) = -$   
450  $4.74$ ;  $p < 0.01$ ,  $t(22) = -2.83$ ;  $p < 0.01$ ). Additionally IE score in the two subtests of the BDE  
451 battery differed across groups ( $t(22) = 4.40$ ;  $p < 0.01$ ). Here dyscalculics were significantly less  
452 accurate and slower than participants in the control group ( $t(22) = -3.54$ ;  $p < 0.01$ ;  $t(22) = 3.96$ ;  
453  $p < 0.01$ ).

454

## 455 **Experiment 1: sequential judgments in subjects without** 456 **math difficulty**

457 In Experiment 1, participants performed the numerosity and average item size task  
458 with sets of dots presented sequentially. Weber fractions were in line with those expected  
459 based on the pilot study measurements, being equal to  $0.16 \pm 0.08$  for number and to  
460  $0.16 \pm 0.03$  for mean size judgments. To evaluate whether participant's responses were  
461 affected by changes in the unattended dimension we compared the proportion of errors in  
462 congruent versus incongruent trials and the PSE values obtained by fitting psychometric  
463 curves after separating the trials according to the magnitude of the unattended dimension.

464

### 465 **Congruency effect**

466 Fig 2 illustrates the proportion of errors made in the numerosity (Fig 2A) and average  
467 size (Fig 2B) task when judging congruent (solid lines) and incongruent (dashed lines) trials  
468 as a function of the ratio tested (grouped in far, medium and close with respect to the  
469 reference, as symmetric values were tested). As expected, in both tasks subjects made on  
470 average more errors when judging the most difficult ratios. Interestingly, numerosity  
471 judgments were not affected by congruency, while the proportion of errors made during the  
472 average size task was higher for the incongruent trials with respect to the congruent ones.  
473 The congruency effect observed in the average size task was smallest for the easiest ratios  
474 and tended to increase as the distance between test and reference decreased.

475 To quantify these effects the proportion of errors was entered in a 2 (task: judge  
476 number/mean size) x 2 (congruency: congruent/incongruent) x 3 (ratios) repeated measure  
477 ANOVA. The significant triple interaction between task, congruency and ratio ( $F(2,26)=21.94$ ;  
478  $p < 10^{-5}$ ) and the post-hoc comparison tests confirmed that congruency affected accuracy  
479 differently during the two tasks as a function of the ratios to be compared. The congruency  
480 with the unattended dimension did not affect the proportion of errors made during the  
481 numerosity comparisons at any ratio tested (ratio far:  $p=0.45$ ; ratio medium:  $p=0.95$ ; ratio  
482 close:  $p=0.47$ ). On the contrary, in the average size task the error rate during incongruent  
483 trials was smallest for the easier ratios and tended to increase as the comparison between  
484 arrays of different average sizes became more difficult (ratio far:  $p=0.12$ ; ratio medium:  
485  $p=0.002$ ; ratio close:  $p < 10^{-5}$ ).

486

### 487 **Interference from the unattended dimension**

488 To test whether and in which direction the unattended magnitude was biasing  
489 participants' responses, we evaluated the shift along the x axis of the psychometric curves  
490 when fitted using trials where the unattended dimension was small or big. As shown in Fig  
491 2C, the two curves overlapped when fitted on the average of participants' numerical  
492 judgments, indicating the absence of bias. On the other hand, the two average psychometric  
493 functions clearly separated when fitted on the average size responses (Fig 2D), suggesting  
494 that in this case participants were systematically influenced by the magnitude of the  
495 unattended dimension, i.e. the numerosity of the patch. Specifically, participants tended to  
496 overestimate average size when presented with large numerosity (dark gray curve shifted  
497 towards the left on the x axis) and to underestimate it when presented with small numerosity  
498 (light gray curve shifted towards the right on the x axis). In line with these observations, the 2  
499 (task: judge number/mean size) x 2 (unattended magnitude: small/big) repeated measure  
500 ANOVA performed on PSEs estimates showed a highly significant interaction between task  
501 and magnitude of the unattended dimension ( $F(1,13)=52.17, p<10^{-5}$ ), with PSE estimates  
502 differing between small and large unattended magnitude only for the average size task  
503 ( $p<10^{-5}$ ) but not for the numerosity task ( $p=0.37$ ).

504 The absence of a group average bias when judging numerosity might have been  
505 potentially due to strong but opposite sign effects at the single subject level which cancelled  
506 each other out. However this was not the case, as illustrated by the single subjects'  
507 differences in PSEs estimates (small-big) when judging number in Fig 2E: all subjects'  
508 signed biases were clustered very closely around zero, leading to an overall PSE difference  
509 that was not significantly different from zero ( $t(13)=-0.91, p=0.37$ ). The PSE shift due to  
510 numerosity interference affecting average size judgments was systematically occurring in the  
511 same direction across subjects and was significantly different from zero ( $t(13)=8.53, p<10^{-5}$ ).

512

## 513 **Experiment 2: simultaneous judgments in subjects without** 514 **math difficulty**

515 To assess whether potential differences in attentional or working memory load due to  
516 different presentation modes modulated the interference effect, in Experiment 2 participants  
517 were tested with the numerosity and average size tasks, but with stimuli presented  
518 simultaneously in the periphery instead of sequentially in the center of the screen. Average  
519 Weber fractions were  $0.17\pm 0.03$  for number judgment and  $0.2\pm 0.05$  for mean size judgments,  
520 therefore similar to the ones obtained in the previous experiment, but slightly higher probably  
521 due to the peripheral presentation of the stimuli. Interference from the unattended dimension  
522 was evaluated by applying the same analysis and statistical tests as used in Experiment 1.



523

## 524 **Congruency effect**

525         The proportion of errors was entered in a 2 (task: judge number/mean size) x 2  
526 (congruency: congruent/incongruent) x 3 (ratios) repeated measure ANOVA. When stimuli  
527 were simultaneously presented, similarly to what was observed with sequential displays, the  
528 triple interaction between task, congruency and ratio ( $F(2,26)=16.76$ ,  $p<0.10^{-5}$ ) was  
529 significant. Numerical judgments were never affected by changes in the unattended  
530 dimension (ratio far:  $p=0.82$ ; ratio medium:  $p=0.48$ ; ratio close:  $p=0.22$ ), while congruency  
531 modulated the average proportion of errors made during the average size task, with the  
532 effect being stronger as the ratios to compare became more difficult (ratio far:  $p=0.003$ ; ratio  
533 medium:  $p=0.002$ ; ratio close:  $p<0.10^{-5}$ , Fig 3 A and B).

534

## 535 **Interference from the unattended dimension**

536         When stimuli were presented simultaneously, the irrelevant dimension interfered with  
537 participant's judgments in a way very similarly to when they were shown sequentially. Indeed  
538 while participant's judgments did not differ based on the magnitude of the unattended  
539 dimension when judging numbers, they tended to over- (under-) estimate sizes when  
540 presented with large (small) numerosity (Figs 3 C and D). A 2 (task: judge number/mean  
541 size) x 2 (unattended magnitude: small/big) repeated measure ANOVA was performed on  
542 PSE estimates. The significant interaction between task and magnitude of the unattended  
543 dimension ( $F(1,13)=25.26$ ,  $p<10^{-5}$ ), confirmed that PSE estimates did not differ during  
544 numerosity judgments ( $p=0.37$ ), while they were significantly different when participants were  
545 comparing average sizes ( $p<10^{-5}$ ). When judging numerosity, most of the subjects'  
546 differences in PSE estimates were clustered around zero, and as a consequence of this the  
547 bias was not significantly different from zero across subjects ( $t(13)=0.92$ ,  $p=0.37$ ). On the  
548 other hand the unattended number of dots systematically biased average size judgments in  
549 the same direction across subjects, leading to a significant difference from zero ( $t(13)=6.16$ ,  
550  $p<10^{-5}$ ; Fig 3E).

551

## 552 **Comparison between simultaneous and sequential** 553 **judgments in subjects without math difficulty**

554 In the control group, weber fractions were on average slightly higher when stimuli  
555 were presented simultaneously than when they were presented sequentially (w-values for  
556 numerical judgment simultaneous vs sequential:  $0.17 \pm 0.03$  vs  $0.16 \pm 0.08$ ; w-values for  
557 average size judgment simultaneous vs sequential:  $0.20 \pm 0.05$  vs  $0.16 \pm 0.03$ ). However,  
558 presentation mode did not significantly impact on precision for both visual dimensions (no  
559 significant main effect of presentation mode:  $F(1,13)=1.97$ ;  $p=0.18$ ; no significant interaction  
560 between task and presentation mode  $F(1,13)=1.17$ ;  $p=0.29$ ).

561 To evaluate whether the different attentional and working memory load recruited  
562 when presenting stimuli simultaneously or sequentially modulated the strength of  
563 interference from the unattended dimension, the proportion of errors and PSE biases  
564 measured in Experiment 1 and 2 were directly compared.

565 The proportion of errors was entered in a 2 (presentation mode:  
566 sequential/simultaneous) x 2 (task: judge number/mean size) x 2 (congruency:  
567 congruent/incongruent) x 3 (ratios) repeated measure ANOVA. The significant triple  
568 interaction between task, congruency and ratio ( $F(2,26)=42.07$ ;  $p < 10^{-5}$ ) showed that,  
569 independently from the presentation mode, congruency significantly modulated error rate  
570 during average size (ratio far:  $p=0.002$ ; ratio medium:  $p=0.001$ ; ratio close:  $p < 10^{-5}$ ), but not  
571 during numerical judgments (ratio far:  $p=0.28$ ; ratio medium:  $p=0.62$ ; ratio close:  $p=0.79$ ).  
572 Interactions between the presentation mode and the other factors were not significant,  
573 suggesting that different presentation modes did not change the results (interaction between  
574 presentation mode, task and congruency:  $F(1,13)=1.30$ ;  $p=0.27$ ; interaction between  
575 presentation mode, task and ratio:  $F(2,26)=0.68$ ;  $p=0.51$ ; interaction between presentation  
576 mode, congruency and ratio:  $F(2,26)=1.83$ ;  $p=0.17$ ; interaction between presentation mode,  
577 task, congruency, and ratio:  $F(2,26)=0.53$ ;  $p=0.59$ ).

578 A 2 (presentation mode: simultaneous or sequential) x 2 (task: judge number/mean  
579 size) x 2 (unattended magnitude: small/big) repeated measure ANOVA was performed on  
580 PSE values. The significant interaction between task and magnitude of the unattended  
581 dimension ( $F(1,13)=64.31$ ;  $p < 10^{-5}$ ) showed that, independently from the presentation mode,  
582 the PSEs estimates were affected by the magnitude of the unattended dimension only during  
583 the average size ( $p < 10^{-5}$ ), but not during the numerosity comparisons ( $p=0.79$ ). Moreover  
584 also the interaction between task and presentation mode was significant ( $F(1,13)=5.96$ ;  
585  $p=0.03$ ), with PSEs for average size being overall slightly larger during simultaneous with  
586 respect to sequential presentation ( $p=0.01$ ), while no presentation mode related difference  
587 was observed in the overall PSEs estimates during numerical judgments ( $p=0.30$ ). Other  
588 interactions between presentation mode and the other factors were not significant showing  
589 that the different presentation modes did not alter the strength of the bias from the

590 unattended dimension (interaction between presentation mode and magnitude of the  
591 unattended dimension:  $F(1,13)=1.87$ ;  $p=0.19$ ; interaction between presentation mode, task  
592 and magnitude of the unattended dimension:  $F(1,13)=0.02$ ;  $p=0.89$ ).

593

594 To sum up, in the group of adult subjects without math difficulties, incongruent  
595 information from the unattended dimension increased the proportion of errors only when  
596 participants were comparing average size, but not when they were comparing numerosity.  
597 The congruency effect observed in the average size task was particularly strong when  
598 difficult ratios were tested and it was smaller for the easiest comparisons. The magnitude of  
599 the unattended dimension biased participants' responses so that they judged more (less)  
600 numerous arrays as containing larger (smaller) average sizes. On the other hand, the  
601 magnitude of the irrelevant information did not bias numerical judgments. Differences in  
602 attentional and working memory recruitment caused by simultaneous or sequential  
603 presentation of the stimuli did not affect these results.

604

### 605 **Experiment 3: simultaneous judgments in the dyscalculic** 606 **group**

607 In Experiment 3, a group of adult dyscalculic subjects performed the numerosity and  
608 average size tasks with stimuli presented simultaneously as in Experiment 2. Weber fractions  
609 were equal to  $0.21 \pm 0.07$  for numerical judgments and to  $0.23 \pm 0.05$  for mean size  
610 comparisons. To evaluate the interference from the unattended dimension during both tasks,  
611 the same analysis and statistical tests as used in the previous experiments were applied.

612

### 613 **Congruency effect**

614 Differently from what was observed in the control group, in the dyscalculic group the  
615 congruency with the unattended dimension affected both numerosity and size comparisons  
616 (Figs 4 A and B). Indeed the proportion of errors made during the numerosity task was on  
617 average higher for the incongruent trials with respect to the congruent ones, as it was the  
618 case for the average size task.

619 These effects were quantified by entering the proportion of errors in a 2 (task: judge  
620 number/mean size) x 2 (congruency: congruent/incongruent) x 3 (ratios) repeated measure  
621 ANOVA. The interaction between task and ratio was significant ( $F(2,18)=12.05$ ;  $p < 10^{-5}$ )  
622 because, independently from the congruency, the overall error rate during numerical

623 judgments for the most difficult ratios was higher than the one during the average size task  
624 for the same ratio ( $p=0.03$ ). The interaction between congruency and ratio was significant  
625 ( $F(2,18)=8.7$ ;  $p=0.002$ ), and equal in the two tasks (interaction between task, congruency  
626 and ratio:  $F(2,18)=0.34$ ;  $p=0.71$ ). This is because the judgments during the numerosity and  
627 average size task were both affected by congruency (interaction between congruency and  
628 task:  $F(1,9)=2.59$ ;  $p=0.14$ ) which was similarly affecting all the ratios tested: in both tasks, the  
629 strength of the congruency effect was smaller for the easier comparisons and tended to  
630 increase for the most difficult ratio tested.

631

## 632 **Interference from the unattended dimension**

633 Numerosity judgments of dyscalculic participants appeared to be biased by the  
634 magnitude of the unattended dimension, as shown in Fig 4C. Indeed, on average, they  
635 tended to overestimate numerosity when presented with large average item sizes and to  
636 underestimate it when shown with small average item sizes. The same tendency as the one  
637 observed in control subjects was found for the average size task, overestimating mean sizes  
638 when presented with higher numerosity and vice versa (Fig 4 D). Because both numerical  
639 and average size judgments were affected by the magnitude of the unattended dimension, in  
640 a 2 (task: judge number/mean size) x 2 (magnitude unattended: small/big) repeated  
641 measures ANOVA performed on PSE estimates in the dyscalculic group, the interaction  
642 between task and magnitude of the unattended dimension was not significant ( $F(1,9)=3.09$ ;  
643  $p=0.11$ ). There was a significant main effect of the magnitude of the unattended dimension  
644 ( $F(1,9)=15.63$ ;  $p=0.003$ ), reflected by the psychometric curve's shift and different PSE  
645 estimates. There was also a main effect of the task ( $F(1,9)=23.90$ ;  $p=0.001$ ) because the  
646 overall PSE estimated during the average size task was larger than the one during the  
647 numerosity task. However, while the magnitude of the unattended dimension showed a  
648 tendency to interfere with judgments in both tasks, post-hoc comparison showed that the  
649 PSE shift was significant only in the average size ( $p=0.001$ ) and not in the numerosity task  
650 ( $p=0.10$ ). Indeed, despite the fact that most subjects in the dyscalculic group showed  
651 stronger PSE shifts due to size interference during numerical judgments with respect to  
652 controls, the direction of the bias was not the same for all subjects: some dyscalculic  
653 subjects tended to strongly overestimate numerosity when presented with large average  
654 sizes, while some others tended to underestimate it (Fig 4E). Due to this fact, the overall  
655 effect tended to cancel out and the signed PSE bias (small-big), was not significantly  
656 different from zero for the number task ( $t(9)=1.78$ ,  $p=0.10$ ). On the other hand, the

657 unattended numerosity significantly biased average size judgments ( $t(9)=5.10$ ,  $p=0.01$ ), in  
658 the same direction as the one shown by the control group.

659

## 660 **Comparison of control and dyscalculic groups**

### 661 **Overall Weber fractions**

662 When judging average size the overall weber fraction was comparable between the  
663 dyscalculic and control subjects (w-values for dyscalculics vs controls:  $0.23\pm 0.05$  vs  
664  $0.20\pm 0.05$ ). Compared to average size, the average between groups difference in numerical  
665 precision was larger (w-values for dyscalculics vs controls:  $0.21\pm 0.07$  vs  $0.17\pm 0.03$ ), with  
666 higher weber fraction for the dyscalculic group corresponding to an effect size (Cohen's d) of  
667 0.83 which suggests a relatively large difference in numerical precision between the two  
668 groups, yet not reaching statistical significance (no interaction between task and group  
669  $F(1,22)=0.16$ ;  $p=0.69$ ).

670

### 671 **Congruency effects in accuracy and signed biases**

672 To evaluate whether the dyscalculic group's judgments were differently affected by  
673 the irrelevant dimension with respect to the control group, we directly compared the  
674 proportion of errors and PSE values measured in the two groups when the same paradigm  
675 was used (i.e. when stimuli were simultaneously presented in Experiment 2 and 3).

676 The proportion of errors made by dyscalculic participants was compared to that of the  
677 control group by means of a 2 (task: judge number/mean size) x 2 (congruency:  
678 congruent/incongruent) x 3 (ratios) repeated measure ANOVA with group as between  
679 subjects factor. There appeared a significant quadruple interaction between task,  
680 congruency, ratio and group ( $F(2,44)=4.15$ ,  $p=0.02$ ) and the post hoc tests showed that with  
681 respect to the control group, the dyscalculic group made significantly more errors during the  
682 numerical task, when comparing the most difficult ratio of incongruent trials (differences  
683 across groups: ratio far:  $p=0.25$ ; ratio medium:  $p=0.13$ ; ratio close:  $p<0.03$ ). Dyscalculics  
684 scored almost twice the errors made by the control subjects when presented with  
685 incongruent trials and difficult ratio ( $0.23\pm 0.03$  in controls vs  $0.36\pm 0.042$  in dyscalculics). Both  
686 groups were equally affected by congruency during average size judgments and the  
687 congruency effect was not significantly stronger for the dyscalculic group with respect to the  
688 control group at any ratio tested ( $p>0.05$  for all comparisons). The interactions between  
689 group and the other factors were not significant (interaction between task, congruency and

690 group:  $F(1,22)=1.27$ ,  $p=0.27$ ; interaction between task, ratio and group:  $F(2,44)=1.33$ ,  
691  $p=0.27$ ; interaction between congruency, ratio and group: ( $F(2,44)=0.56$ ,  $p=0.57$ ).

692 To evaluate group differences in signed bias a 2 (task: judge number/mean size) x 2  
693 (magnitude unattended: small/big) repeated measures ANOVA was performed on PSE  
694 estimates with group as between subjects factor. As described earlier, the magnitude of the  
695 unattended dimension induced a bias in the dyscalculic group not only during average size  
696 comparisons, as in the control group, but also during numerosity judgments. When directly  
697 comparing the PSE bias across the dyscalculic and controls groups, the interactions between  
698 group and the other factor were not significant (interaction between task and group:  
699  $F(1,22)=2.91$ ;  $p=0.09$ ; interaction between magnitude of the unattended dimension and  
700 group:  $F(1,22)=0.85$ ;  $p=0.36$ ; interaction between task, magnitude of the unattended  
701 dimension and group:  $F(1,22)=1.91$ ;  $p=0.18$ ). However, it is important to note that the  
702 absence of group differences in the bias induced by the unattended magnitude during  
703 numerical judgments could be explained by strong biases in opposite directions at the single-  
704 subject level in the dyscalculic group, resulting in only a modest signed PSE bias at the  
705 group level. On the contrary, the absence of group differences in the bias elicited by the  
706 unattended numerical magnitude during average size comparisons suggests that  
707 dyscalculics were not more affected by the unattended dimension with respect to the control  
708 group, given that the single subject's signed bias was always in the same direction in both  
709 groups.

710 In sum, with respect to the control group, the dyscalculic group made more errors  
711 when asked to compare numerosity, although this was significant only for incongruent trials  
712 at the most difficult ratios. The congruency effect equally affected error rate across the two  
713 groups during the average size task. No significant difference was observed in the signed  
714 PSE biases across groups. This is likely a consequence of the fact that these measures are  
715 insufficiently representing the pattern present in the data, where in the dyscalculic group  
716 relatively strong biases are found but in opposite directions across different participants.

717

## 718 **Unsigned bias**

719 To evaluate whether the dyscalculic group showed an overall stronger interference  
720 (irrespective of its directions) from the unattended dimension with respect to the control  
721 group, the unsigned PSE biases measured during simultaneous judgment in Experiments 2  
722 and 3 were directly compared. The dyscalculic group showed a much larger absolute bias  
723 mainly when judging numerosity, while the absolute size of interference was comparable  
724 across the two groups in the average size task (Fig 5). Accordingly, a one-way ANOVA (task:  
725 judge number/mean size) with group as between-subjects factor performed on the absolute

726 biases yielded a significant interaction between task and group ( $F(1,22)=5.8$ ;  $p=0.02$ ). The  
727 additional post-hoc tests confirmed that, while dyscalculics' numerical judgments were  
728 subject to a larger absolute bias with respect to the control group ( $p<10^{-5}$ ), for the average  
729 size task the groups did not differ significantly in the same measure ( $p=0.87$ ). Thus, the  
730 dyscalculic group differed from the control group in the absolute degree of the interference,  
731 but crucially, this was only observed during numerosity, but not during size judgment.

732 In sum, while participants in the control group could compare numerosity without a  
733 major influence from the unattended dimension, judging numerosity was more challenging for  
734 dyscalculic participants, and affected by the magnitude of the unattended size dimension,  
735 though not in the same direction across all participants. When asked to compare average  
736 sizes, dyscalculic participants were not more influenced by the numerical, irrelevant,  
737 information with respect to control participants, and the interference in this task was  
738 comparable across groups.

739

## 740 **Correlation analyses**

741 To evaluate whether our data support the link between mathematical performance  
742 and precision of numerosity discrimination, we correlated the overall JND during numerical  
743 judgments and the IE score for mental calculation. We observed a significant correlation  
744 between mental calculation abilities and overall precision during numerical discrimination  
745 ( $r=0.6$ ,  $p=0.002$ ), even after controlling for group and inhibitory skills as measured by the  
746 color-word Stoop task ( $r=0.53$ ,  $p=0.01$ ). No significant correlation emerged when correlating  
747 mental calculation and overall precision during average size comparisons ( $r=0.32$ ,  $p=0.12$ ).

748 Under the hypothesis that stronger interference from the unattended dimension might  
749 emerge whenever the task difficulty increases, correlation analysis was performed to test  
750 whether the less precise subjects were also those whose judgment was more biased. To this  
751 aim we correlated the absolute magnitude of the bias with the overall JND. The numerosity  
752 interference during average size discrimination strongly correlated with overall precision in  
753 the average size task ( $r=0.71$ ,  $p=0.0001$ ), suggesting that as the difficulty of size  
754 discrimination increased (across subjects), interference from the unattended number  
755 dimension also increased (Fig 6A). Also, the correlation between average size interference  
756 during numerical judgments and JNDs for numerosity discrimination was significant ( $r=0.54$ ,  
757  $p=0.006$ , Fig 6B), however this was mainly due to the strong difference between groups.  
758 Correlations within individual groups did not reach significance, probably due to the small  
759 sample size available. Hence these correlations confirmed that less precise subjects were  
760 more influenced by the magnitude of the unattended dimension.

761           To evaluate whether interference during the number and/or size task was related to  
762 mathematical performance, we correlated the absolute magnitude of the bias with the IE  
763 score for mental calculation. Numerical interference during average size judgments did not  
764 correlate with math performance ( $r=-0.02$ ,  $p=0.90$ , Fig 7A). Instead, size interference during  
765 numerosity judgments highly correlated with mental calculation skills ( $r=0.60$ ,  $p=0.002$ , Fig  
766 7B), and this relation remained significant even when partialling out the group factor ( $r=0.41$ ,  
767  $p=0.04$ ), the inhibitory skills as measured with the color-word Stroop task ( $r=0.63$ ;  $p=0.001$ )  
768 and both group and inhibitory skills at the same time ( $r=0.47$ ,  $p=0.03$ ). Therefore the  
769 magnitude of the bias was related to mathematical ability only for numerosity, and not for  
770 size judgement. The subjects more proficient in mental calculation were also those who more  
771 efficiently discarded the irrelevant size information when comparing numerosity, while no  
772 relation was found with the bias during the average size task.

773



## 774 Discussion

775 With the current study we aimed to evaluate for the first time the reciprocal  
776 interference between numerosity and another continuous dimension, average item size,  
777 under conditions where the perceptual discriminability was matched across tasks requiring  
778 judgement of one or the other dimension. Secondly, by testing dyscalculic adults on different  
779 quantitative dimensions of the same stimuli, we were able to directly compare the number  
780 sense deficit hypothesis of dyscalculia against the hypothesis of a domain-general inhibition  
781 deficit. Specifically, we evaluated whether dyscalculics were overall more subject to  
782 interference, in line with a general weakness in inhibiting task-irrelevant information, or  
783 whether numerosity judgment was preferentially affected by the unattended dimension,  
784 supporting a (domain specific) number sense deficit.

785 While participants without math impairments were able to compare numerosity  
786 without notable interference from the unattended dimension, they tended to overestimate  
787 mean sizes when presented with large numerosity, and tended to underestimate them when  
788 shown with small numerosity. This pattern of results was not affected by the presentation  
789 mode (sequential or simultaneous), suggesting that the interference pattern is unaffected by  
790 different allocation of attention or visuo-spatial memory load, at least as far as they relate to  
791 differences in presentation modes. Contrary to the controls, the dyscalculic group was  
792 strongly affected by the congruency of the irrelevant size information during numerosity  
793 judgment, although during average size judgement both groups were affected by the number  
794 of dots in the arrays to the same degree. Interestingly, only the ability to discard the irrelevant  
795 size information when comparing numerosity (but not vice versa) significantly predicted  
796 calculation ability.

797 The absence of interference from the unattended size dimension during numerosity  
798 judgement found in the present experiment in normal subjects contrasts with the often strong  
799 interference effects reported in the literature (Dakin et al., 2011; Gebuis et al., 2009; Gebuis  
800 and Reynvoet, 2012a, 2012b; Hurewitz et al., 2006; Leibovich et al., 2016a) even though in a  
801 few other cases, interference on numerosity judgement was also reported to be absent  
802 (Barth, 2008; Tokita and Ishiguchi, 2010). These differences may be due to a combination of  
803 several factors: our study used less difficult numerical ratios than some other studies, in  
804 combination with a relatively less extreme variation in the unattended dimension (DeWind et  
805 al., 2015; Hurewitz et al., 2006; Nys and Content, 2012; Tokita and Ishiguchi, 2010). To our  
806 knowledge, the present experiment is the first one to use stimuli that were calibrated based  
807 on previously measured thresholds for each dimension.

808           In addition, our study used relatively small numbers of items, contrasting with the  
809 much larger numerosities employed in some other studies (Bell et al., 2015; Dakin et al.,  
810 2011; Nys and Content, 2012). Behavioral evidence (Anobile et al., 2015, 2013a) supports a  
811 transition between a “number” and a “density” regime governed by different psychophysical  
812 laws. As a consequence, perceptual sensitivity for large numbers of densely spaced items  
813 can be predicted by the combined sensitivity to density and field area, but sensitivity for  
814 smaller numbers of well-segregated items cannot. For not too large numbers and not too  
815 densely spaced items, numerosity has also been shown to be the dimension that  
816 spontaneously drives humans’ and monkeys’ choices during quantity discrimination tasks  
817 (Cicchini et al., 2016; Ferrigno et al., 2017). Since our stimuli were explicitly chosen to fall  
818 into the “number” regime, they are more likely to have recruited processing mechanisms  
819 based on segmented items rather than indirect proxies to these such as the combination of  
820 texture density and area, which may have come into play in other studies. Of interest, Tokita  
821 and Ishiguchi (2010) already observed that the strength of size interference during  
822 numerosity judgments increased with numerosity, thus becoming stronger as stimuli were  
823 increasingly likely to move into the density regime. However, when testing smaller numbers  
824 of items, no interference emerged.

825           On the basis of the findings of Algom et al. (1996) in the number-size interference  
826 with numerical symbols we would have expected our stimuli to produce an equal amount of  
827 bi-directional interference. Instead, we observed that only average size judgement was very  
828 consistently affected by numerosity, suggesting that the principles governing interference for  
829 symbolic number-size tasks do not apply in the same way to non-symbolic quantitative  
830 stimuli.

831           The fact that interference is nevertheless more pronounced during mean size  
832 judgments, could mean that irrespective of the matched objective degree of discriminability,  
833 numerosity has a higher intrinsic salience or capacity to grab attention, and is therefore  
834 exerting an influence on response selection. Alternatively, interference might arise from the  
835 sensory mechanisms responsible for extracting mean size. Several lines of evidence suggest  
836 that mean size is a basic, automatically encoded visual dimension (Ariely, 2001; Chong and  
837 Treisman, 2005, 2003; Corbett et al., 2012), which is susceptible to adaptation (Corbett et al.,  
838 2012), as numerosity (Burr and Ross, 2008; Ross, 2010). Mean size is thought to be  
839 perceived holistically (Ariely, 2001; Chong and Treisman, 2003) through some kind of  
840 summary statistics extracted from the visual scene, most likely related to texture rather than  
841 individual object processing (Im and Halberda, 2013). Nevertheless, the precise  
842 implementation of mean size estimation is currently unknown. Of note, however, Dakin et al.  
843 (2011) provided an illustration of how a particular combination of spatial filters applied to an

844 image could provide information about mean item size. Whether this or other similar  
845 measures could explain the existence of perceptual biases for mean size, and if so in which  
846 direction, will be an interesting question for future studies.

847         Only very few studies in addition to ours so far investigated the discrimination of  
848 numerosity in adult dyscalculic subjects and found that the deficit in non-symbolic numerical  
849 proficiency persisted into adult age (Cappelletti et al., 2014a; Cappelletti and Price, 2014; De  
850 Visscher et al., 2017; Gilaie-Dotan et al., 2014; Mejias et al., 2012). Here we found that the  
851 weber fraction for numerosity was on average lower in dyscalculics than in controls, however  
852 this difference did not reach statistical significance, which could be due to the modest sample  
853 size available. It is further possible that in adult subjects the non-symbolic enumeration  
854 difficulty is more subtle than in children, and easily detected only with more difficult tasks,  
855 such as the estimation task used by Mejias et al (2012) or discrimination tasks with displays  
856 of spatially intermixed differently colored dots (Cappelletti et al., 2014a; Cappelletti and Price,  
857 2014; Gilaie-Dotan et al., 2014) or sequential presentation (De Visscher et al., 2017) which  
858 might exert more demands on working memory compared to the tasks used here.  
859 Nevertheless, even in our experiment, we measured a significantly lower accuracy in  
860 dyscalculics with respect to controls for the most difficult numerical ratios and, at this level,  
861 congruency effects on accuracy were strongest.

862         Recent studies investigating dyscalculic children or inter-individual differences in the  
863 developing population have concluded that enhanced behavioral interference from covarying  
864 quantities during numerosity processing are indicative of an impairment of general executive  
865 / inhibitory skills which would fully explain the relationship between the approximate number  
866 system and math (Bugden and Ansari, 2016; Fuhs and McNeil, 2013; Gilmore et al., 2013;  
867 Szűcs et al., 2013). Nevertheless, at least two studies also reported that mathematical  
868 competence was associated with numerical acuity over and above inhibitory skills in normally  
869 developing children (Bellon et al., 2016; Keller and Libertus, 2015). Our results are in line  
870 with the latter findings, as mathematical performance in our group of subjects was correlated  
871 with the precision of numerical judgments, even after controlling for inhibitory control, as  
872 measured by the color-word Stroop task.

873         Furthermore, in our psychophysical testing with two different tasks on an equivalent  
874 stimulus set, the dyscalculic group showed stronger interference from the unattended  
875 dimension than the control group during numerosity judgement only (and not during size  
876 judgement). These results are hard to reconcile with the idea of a general inhibition  
877 impairment as the source of the interference during quantity judgement, since such an  
878 impairment would have been expected to affect both tasks equally.

879 We do not deny the existence of potential inhibitory deficits in dyscalculia, nor that  
880 inhibitory skills play an important role in arithmetic performance in general. Indeed, arithmetic  
881 is a complex skill involving a variety of executive attention processes, as well as working  
882 memory, fact retrieval, and procedure application. What we are cautioning against here is the  
883 uncritical equation of any enhanced interference during quantity processing with a domain  
884 general executive function (inhibition) impairment. The enhanced interference during  
885 numerosity judgments observed in our dyscalculic group could reflect a difficulty in inhibiting  
886 or filtering out irrelevant information which, however, occurs only during numerosity  
887 judgments and therefore needs to be domain specific or a heuristic use of non-numerical  
888 features to cope with the difficulty in discriminating numbers. Hints in support of the second  
889 hypothesis arise from the observation that the direction of interference during numerical  
890 judgments was not always the same across subjects in the dyscalculic group, suggesting the  
891 adoption of a 'cognitive' strategy to solve a task difficult for them.

892 Indeed, a likely possibility is that these subjects, due to a more imprecise  
893 representation of discrete numbers of items, gave more weight in their decisions to low-level  
894 dimensions which are partially correlated with numerosity under everyday situations. For  
895 example, overestimating numerosities with *larger* dot sizes could indicate some reliance on  
896 the overall amount of stimulus energy / total surface area. For overestimation of numerosity  
897 with *smaller* dot sizes, it is much less evident which dimension might be relied on. However,  
898 this is a common pattern of the interference observed in multiple prior studies in normal  
899 subjects, at least for numerosities larger than those used in our study (Gebuis and Reynvoet,  
900 2012a, 2012b; Ginsburg and Nicholls, 1988; Sophian and Chu, 2008; Tokita and Ishiguchi,  
901 2010). Interestingly, this is also the direction of bias predicted by a model based on  
902 measures of the relative amount of energy in high and low spatial frequencies of the image  
903 (Dakin et al., 2011; Tibber et al., 2012), suggesting that this pattern could be related to the  
904 reliance on a texture-like representation of the input.

905 Furthermore, differences in the direction of the interference (over- as opposed to  
906 underestimation) have also been observed previously in normal subjects between different  
907 participants within the same study (DeWind et al., 2015, Fig 3). That study used an elegant  
908 approach based on a stimulus space which orthogonalized numerosity with respect to two  
909 other mathematically derived dimensions ("size in area", a combination of total surface and  
910 individual item area, and "spacing", an equivalent combination of total field area and  
911 sparsity). Their procedure then allowed the authors to determine which of those three main  
912 dimensions (or their combinations) best explained subjects' choices. The intention of our  
913 study was somewhat different from theirs: we wanted to evaluate the degree of interference  
914 when subjects judge our stimuli on either dimension, rather than numerosity only, as done by

915 Dewind et al (2015). This is why we chose (mean) item size as the dimension orthogonal to  
916 numerosity, rather than a dimension such as “size in area” which does not correspond to a  
917 natural perceptual dimension that subjects are used to judge. However, this different choice  
918 also implies that our design is less suitable for analyses similar to those performed by  
919 Dewind and colleagues.

920 In line with the idea that behavioral interference increases when judgment of the  
921 attended dimension becomes more difficult for a subject, we observed a strong correlation  
922 between biases in the subjects’ responses and their overall precision during average size  
923 discrimination. In other words, the subjects that were less accurate in judging average size  
924 were also those showing stronger numerical interference. The same relation appeared for  
925 numerical judgments, in which case it coincided with a group effect, with dyscalculics  
926 showing lower JNDs and a stronger bias than controls. Crucially, only size interference in  
927 numerical judgments correlated with mathematical abilities (even when controlling for the  
928 factor of group), supporting a critical link between mathematical performance and numerosity  
929 representation specifically, rather than either a general tendency for bias in the presence of  
930 incongruency, or the representation of any quantitative dimension.

931 The fact that here we did not observe size perception to be related to mathematical  
932 abilities also fits with other results demonstrating that dyscalculics are not impaired in the  
933 discrimination of line length (Cappelletti et al., 2014a; De Visscher et al., 2017) or cumulative  
934 area (Iuculano et al., 2008), that education selectively sharpens acuity for numerosity but not  
935 single object size (Piazza et al., 2013), and that in the normal population mathematical ability  
936 correlates with number, but not with size discrimination thresholds (Anobile et al., 2017),  
937 though see (Lourenco et al., 2016) for a significant finding regarding cumulative area.  
938 Previous work has also found numerosity but not density sensitivity to be related to the  
939 normal development of mathematical abilities in children (Anobile et al., 2016a). Given that  
940 average size as density perception is thought to rely on texture processing mechanisms  
941 rather than processing of individual items (Im and Halberda, 2013), our findings suggest that  
942 texture processing abilities may be preserved in dyscalculics, a possibility that should be  
943 further addressed in future studies.

944

945 To conclude, using a stimulus set which tested for the amount of mutual interference  
946 between numerosity and another quantitative dimension (average item size), with task  
947 relevant dimensions matched for discriminability, we found that numerosity could be  
948 perceived by normal subjects without significant interference from the irrelevant size  
949 dimension. Perhaps more counter-intuitively, mean size was more subject to interference

950 than numerosity in this situation. These results further underline the complex nature of  
951 behavioral interference effects between different quantities. More detailed quantitative  
952 modelling of how representations of different quantitative dimensions could be derived from  
953 the retinal image, or how some dimensions may act as priors modulating perceptual  
954 decisions on other dimensions, may help in the future to more fully account for these  
955 phenomena. The pattern of interference observed in dyscalculics during the task used here  
956 suggest that, in adults at least, enhanced interference during numerosity processing is not  
957 the result of a general impairment in executive functions and, more precisely, general  
958 inhibitory skills. We propose that these results may reflect the heuristic use of associated  
959 stimulus dimensions for task purposes in the presence of a less precise representation of  
960 discrete numbers of items, in agreement with the 'number sense deficit' theory of dyscalculia.  
961 An important goal for future studies will be to understand how neuronal representations of  
962 different quantitative dimensions are affected in the dyscalculic brain and how this explain  
963 the present behavioral findings.

964

965

966 **Table 1**

|                           | Control group<br>(N=14) | Dyscalculic group<br>(N=10) | Statistical<br>analysis |
|---------------------------|-------------------------|-----------------------------|-------------------------|
|                           | Mean (STD)              | Mean (STD)                  | t-value                 |
| Age                       | 29 (7)                  | 28 (11)                     | -0.26                   |
| <b>IQ</b>                 |                         |                             |                         |
| Similarities              | 12 (3)                  | 12 (3)                      | -0.56                   |
| Matrices                  | 10 (2)                  | 9 (2)                       | -1.63                   |
| <b>Reading Ability</b>    |                         |                             |                         |
| Time (seconds)            | 98 (19)                 | 121 (32)                    | 2.24*                   |
| N errors                  | 4 (3)                   | 6 (6)                       | 0.91                    |
| <b>Working memory</b>     |                         |                             |                         |
| Verbal                    | 11 (3)                  | 9 (2)                       | -1.94                   |
| Visuospatial              | 13 (2)                  | 9 (2)                       | -4.05**                 |
| <b>Color Stroop</b>       |                         |                             |                         |
| Inhibition Index          | 12 (2)                  | 13 (2)                      | 1.26                    |
| <b>Arithmetical tests</b> |                         |                             |                         |
| TEDI – MATH (no of items) |                         |                             |                         |
| Subitizing (36)           | 34 (2)                  | 30 (4)                      | -2.61 **                |
| Digit Comparison          |                         |                             |                         |
| Accuracy (48)             | 46 (1)                  | 46 (2)                      | -0.11                   |
| Reaction Time (ms)        | 598 (67)                | 763 (147)                   | 3.30 **                 |
| IE score Digit            | 6 (0.6)                 | 7.8 (1.4)                   | 3.54 **                 |
| Multiplication            |                         |                             |                         |
| Accuracy (20)             | 17 (2)                  | 13 (2)                      | -4.74 **                |
| Reaction Time (ms)        | 1913 (497)              | 2961 (1723)                 | 1.86                    |
| Subtraction               |                         |                             |                         |
| Accuracy (20)             | 19 (1)                  | 17 (2)                      | -2.83**                 |
| Reaction Time (ms)        | 1797 (734)              | 2946 (2095)                 | 1.66                    |
| Calculation (x and -)     |                         |                             |                         |
| IE score Calculation      | 41 (14)                 | 79 (50)                     | 2.30 *                  |
| <b>BDE</b>                |                         |                             |                         |
| Accuracy (34)             | 34 (0.4)                | 32 (1.2)                    | -3.54 **                |
| Reaction Time (s)         | 71 (12)                 | 114 (31)                    | 3.96 **                 |
| IE score BDE              | 0.3 (0.06)              | 0.6 (0.16)                  | 4.40 **                 |

DD differs significantly from controls at:

\* p=0.05

\* at p<0.05

\*\*At p<0.01

968 **Figures**

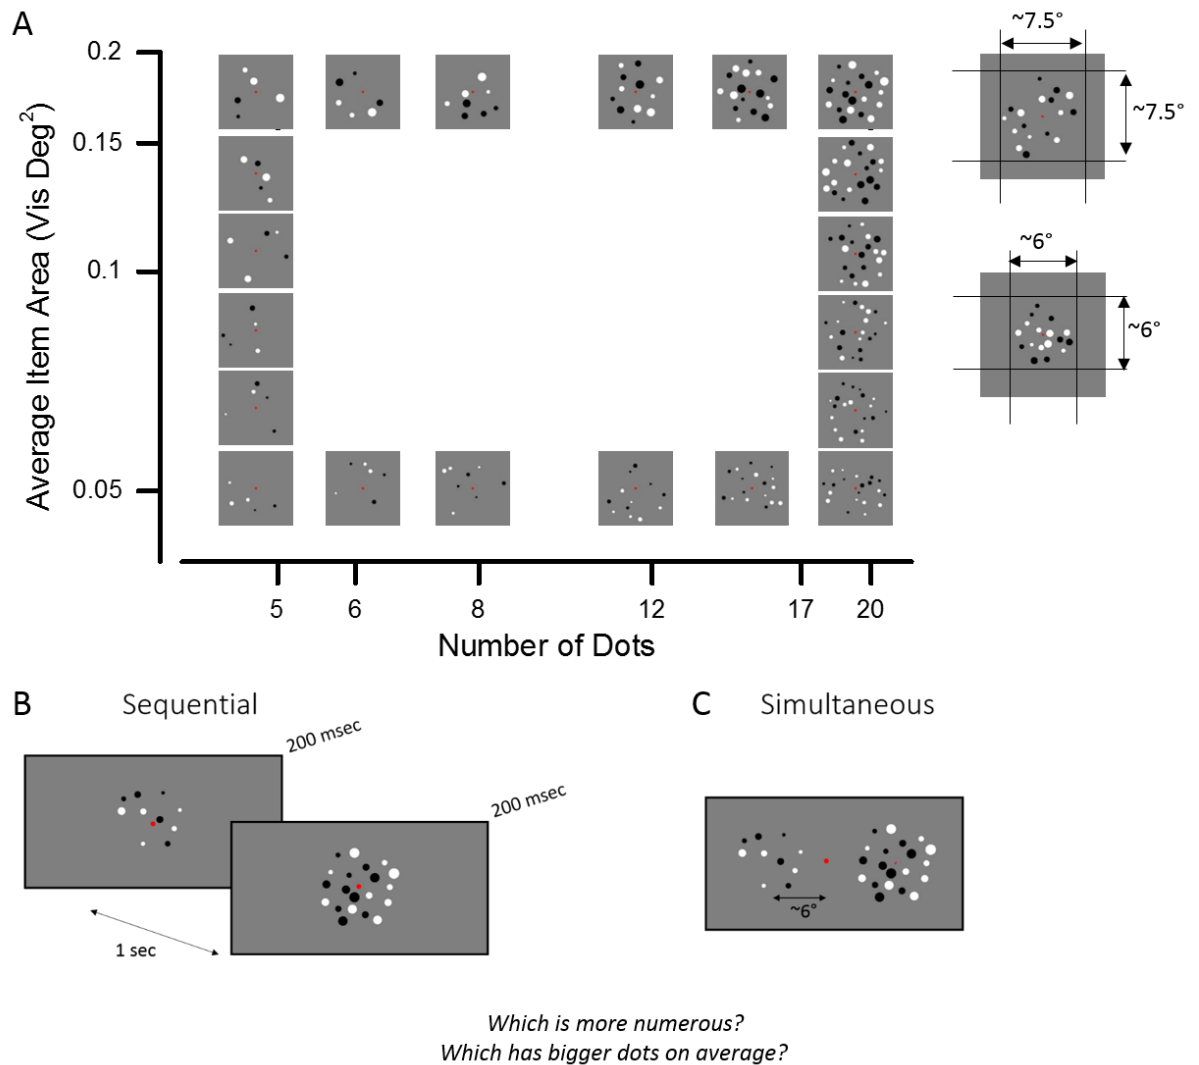

969

970 Fig 1

971 (A) Example of stimuli in the numerosity and average item size comparison tasks. The set of  
972 stimuli was created with two different total field areas of ~7.5° and ~6° diameter. (B, C) The  
973 two stimuli were shown either in sequential or simultaneous presentation mode. In separate  
974 sessions, participants were asked to judge which array contained more dots or which one  
975 contained the dots with the larger average size.

976



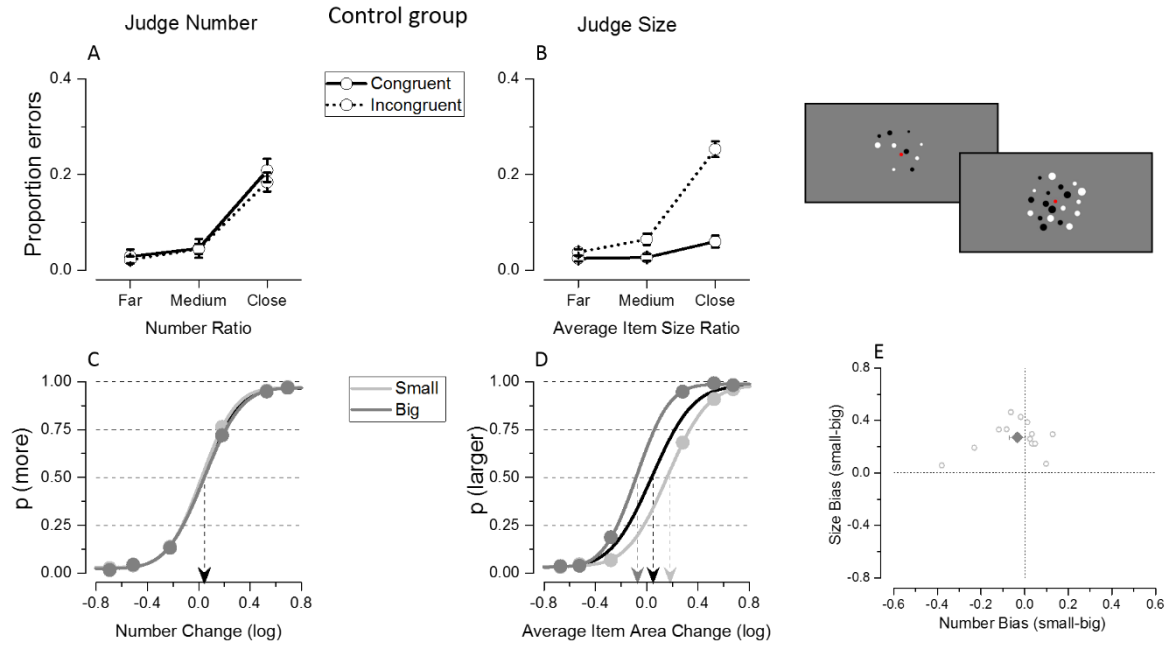

977

978 Fig 2

979 Results from Experiment 1 where control subjects were tested with sequentially presented  
980 stimuli. (A-B) Proportion of errors as a function of ratio of the attended dimension during  
981 numerical (A) and average size (B) judgments. Different lines show the error rate when  
982 participants were tested with congruent (solid line) or incongruent (dotted line) trials. (C-D)  
983 Psychometric functions for the control group for the number (C) and average size (D) tasks.  
984 Black curves fit the entire dataset while light and dark gray curves fit trials that are the small  
985 and the big, respectively, within the unattended dimension. Data in E show the average (dark  
986 big diamond) and single subjects' PSE difference (light gray small circles) during numerosity  
987 (on the x axis) and average size (on the y axis) comparison when the dataset was split for  
988 the magnitude of the unattended dimension (small-big).

989

990

991

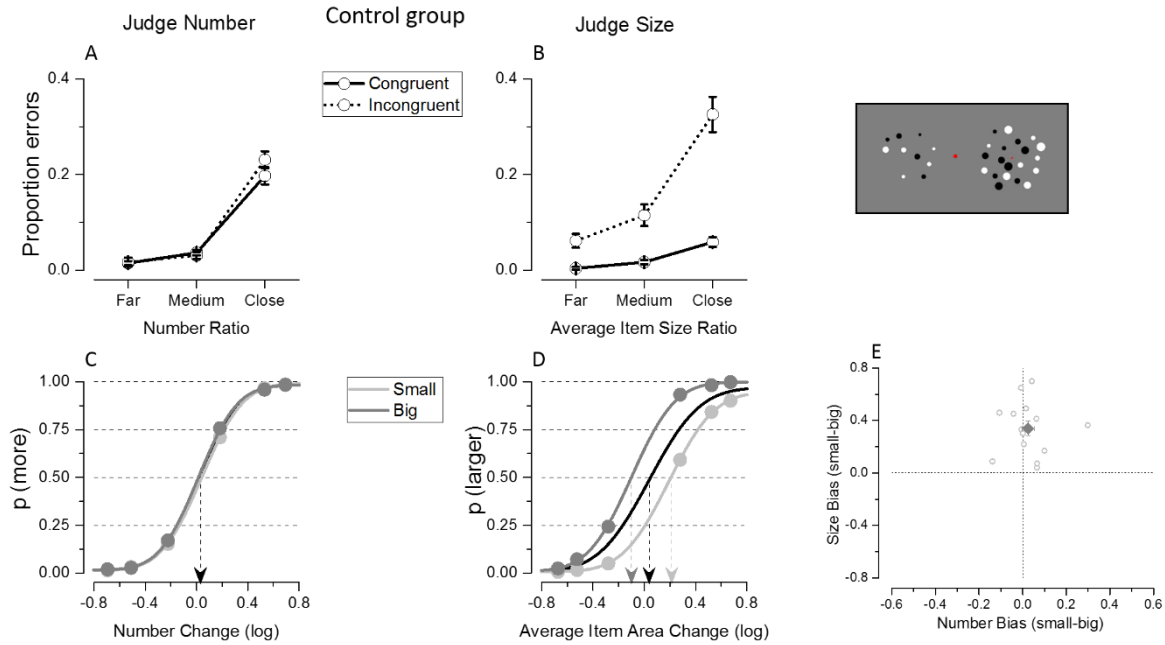

992

993 Fig 3

994 Results of Experiment 2 where the control group was tested with simultaneous presentation.

995 Results show a similar pattern despite the change in presentation mode. Congruency effect

996 and bias from the unattended dimension are evident in the proportion of errors and group

997 average fits during the average size task, but not during the numerosity task.

998

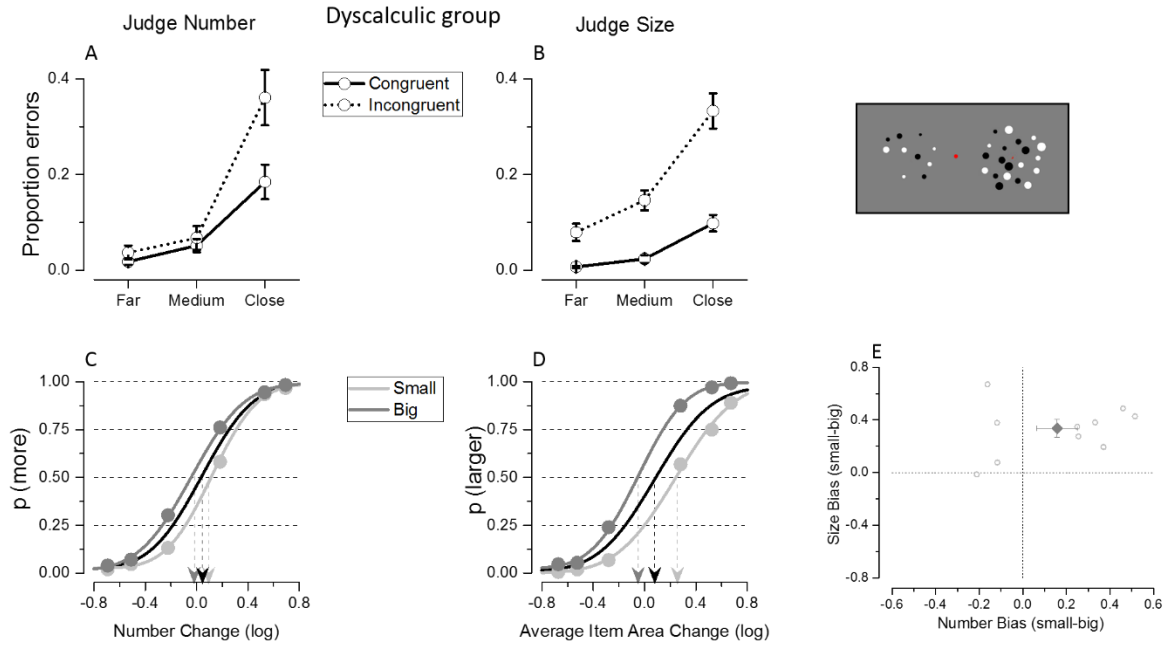

999

1000 Fig 4

1001 Results of Experiment 3 where the dyscalculic group was tested with simultaneous  
1002 presentation. Differently from the control group (Fig 3), a tendency for congruency effects in  
1003 accuracy at the most difficult numerical ratios, and bias from the unattended dimension in the  
1004 group average fits, are visible during numerosity judgments.

1005

1006

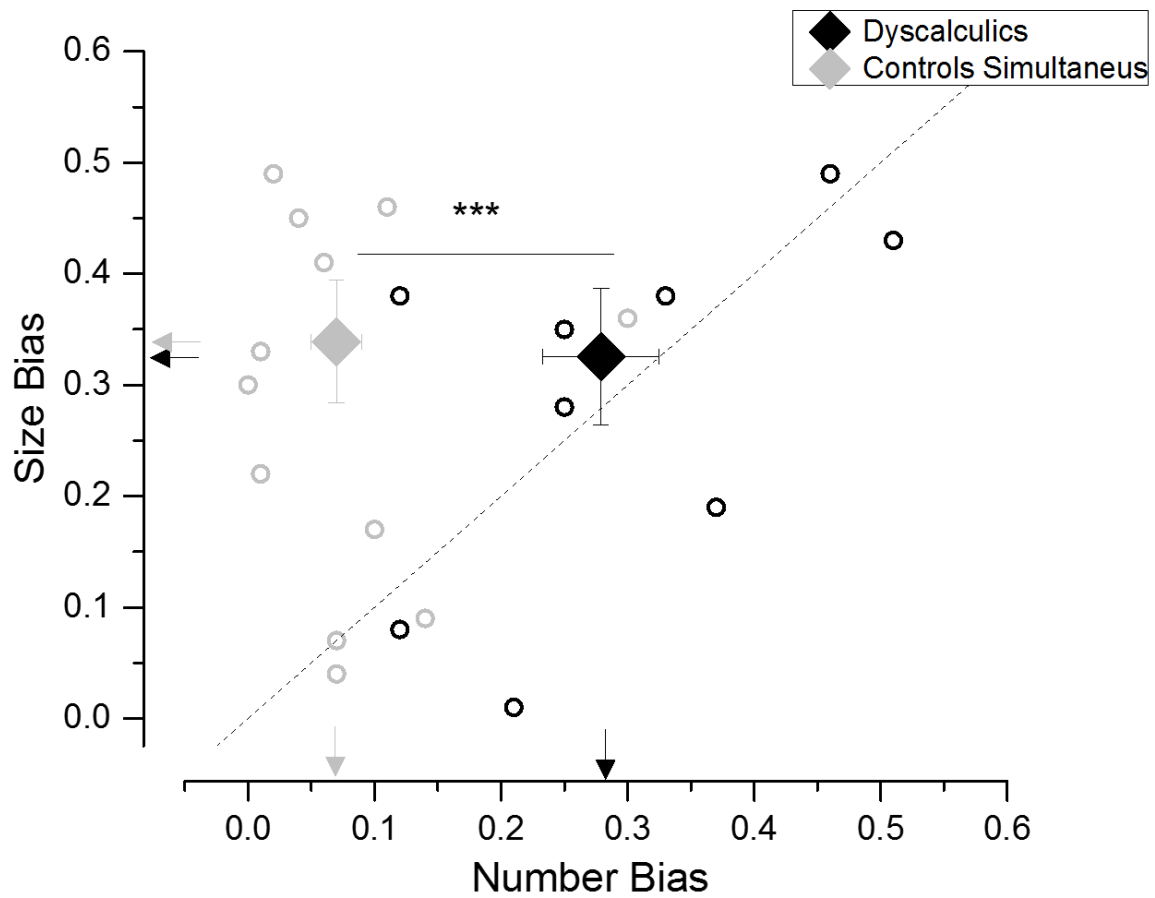

1007

1008 Fig 5

1009 Absolute size of interference effect from the unattended dimension (unsigned PSE bias)  
1010 arising when subjects in the control (gray symbols) and dyscalculic (black symbols) group  
1011 judged numerosity (x axis) or average item size (y axis). Small circles represent individual  
1012 subjects' biases, large diamonds represent the group average  $\pm$  sem. Arrows refer to  
1013 average data values.

1014

1015

1016

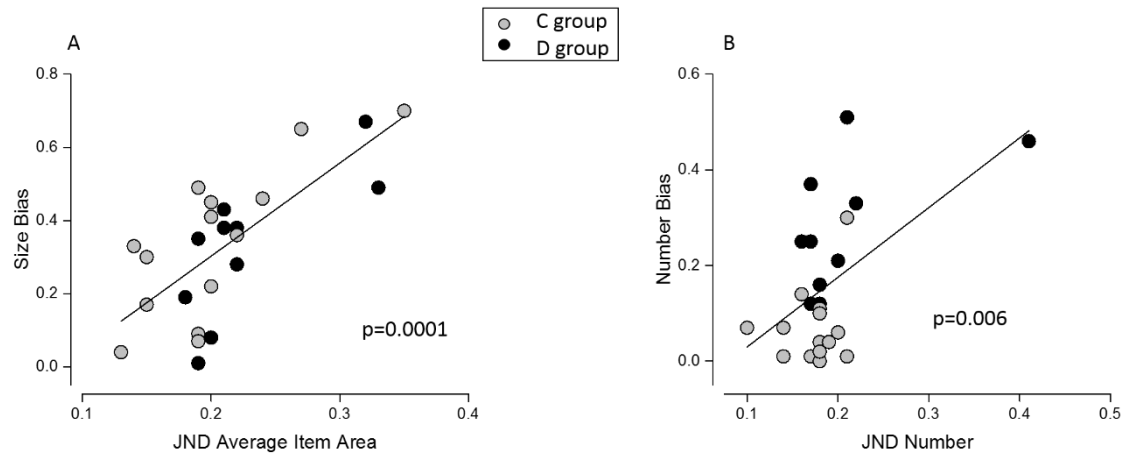

1017

1018 Fig 6

1019 Correlation between the unsigned PSE bias and the overall precision during average size (A)  
1020 and numerosity (B) judgments. Gray and black circles represents participants of the control  
1021 and dyscalculic group, respectively.

1022

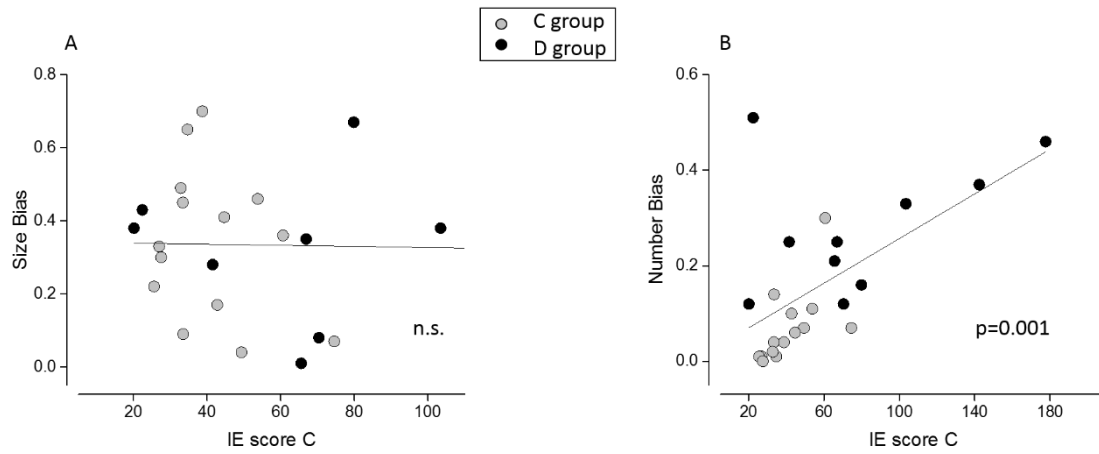

1023

1024 Fig 7

1025 Correlation between the unsigned PSE bias in the average size (A) and numerosity task (B)  
1026 and mental calculation skills. Only size interference during numerical judgment significantly  
1027 correlates with math abilities, even when the factors of group and inhibitory skills are  
1028 partialled out.

1029

1030

1031

## 1032 References

- 1033 Algom, D., Dekel, A., Pansky, A., 1996. The perception of number from the separability of the  
1034 stimulus: The Stroop effect revisited. *Mem. Cognition* 557–572.
- 1035 Anobile, G., Arrighi, R., Castaldi, E., Grassi, E., Pedonese, L., M. Moscoso, P.A., Burr, D.C., 2017. Spatial  
1036 but Not Temporal Numerosity Thresholds Correlate With Formal Math Skills in Children. *Dev.*  
1037 *Psychol.* <https://doi.org/10.1037/dev0000448>
- 1038 Anobile, G., Castaldi, E., Turi, M., Tinelli, F., Burr, D., 2016a. Numerosity but not texture-density  
1039 discrimination correlates with math ability in children. *Dev. Psychol.* 52, 1206–1216.  
1040 <https://doi.org/10.1037/dev0000155>
- 1041 Anobile, G., Cicchini, G.M., Burr, D.C., 2016b. Number As a Primary Perceptual Attribute: A Review.  
1042 *Perception* 45, 5–31. <https://doi.org/10.1177/0301006615602599>
- 1043 Anobile, G., Cicchini, G.M., Burr, D.C., 2013a. Separate mechanisms for perception of numerosity and  
1044 density. *Psychol. Sci.* 0956797613501520.
- 1045 Anobile, G., Stievano, P., Burr, D.C., 2013b. Visual sustained attention and numerosity sensitivity  
1046 correlate with math achievement in children. *J. Exp. Child Psychol.* 116, 380–391.  
1047 <https://doi.org/10.1016/j.jecp.2013.06.006>
- 1048 Anobile, G., Turi, M., Cicchini, G.M., Burr, D.C., 2015. Mechanisms for perception of numerosity or  
1049 texture-density are governed by crowding-like effects. *J. Vis.* 15, 4.  
1050 <https://doi.org/10.1167/15.5.4>
- 1051 Ariely, D., 2001. Seeing sets: Representation by Statistical Properties. *Psychol. Sci.* 157–162.
- 1052 Barth, H.C., 2008. Judgments of discrete and continuous quantity: An illusory Stroop effect. *Cognition*  
1053 109, 251–266. <https://doi.org/10.1016/j.cognition.2008.09.002>
- 1054 Bayard, S., Erkes, J., Moroni, C., 2009. Test du Stroop Victoria-Adaptation Francophone. CPCN-LR  
1055 Gignac.
- 1056 Bell, J., Manson, A., Edwards, M., Meso, A.I., 2015. Numerosity and density judgments: Biases for  
1057 area but not for volume. *J. Vis.* 15, 18–18.
- 1058 Bellon, E., Fias, W., De Smedt, B., 2016. Are Individual Differences in Arithmetic Fact Retrieval in  
1059 Children Related to Inhibition? *Front. Psychol.* 7. <https://doi.org/10.3389/fpsyg.2016.00825>
- 1060 Biancardi, A., Nicoletti, C., 2004. Batteria per la discalculia evolutiva (BDE) [Battery for developmental  
1061 dyscalculia (BDE)]. Turin, Italy.
- 1062 Brainard, D.H., 1997. The psychophysics toolbox. *Spat. Vis.* 10, 433–436.
- 1063 Brannon, E.M., Abbott, S., Lutz, D.J., 2004. Number bias for the discrimination of large visual sets in  
1064 infancy. *Cognition* 93, B59–B68. <https://doi.org/10.1016/j.cognition.2004.01.004>
- 1065 Bugden, S., Ansari, D., 2016. Probing the nature of deficits in the “Approximate Number System” in  
1066 children with persistent Developmental Dyscalculia. *Dev. Sci.* 19, 817–833.  
1067 <https://doi.org/10.1111/desc.12324>
- 1068 Burr, D., Ross, J., 2008. A Visual Sense of Number. *Curr. Biol.* 18, 425–428.  
1069 <https://doi.org/10.1016/j.cub.2008.02.052>
- 1070 Butterworth, B., 2005. Developmental dyscalculia, in: *Handbook of Mathematical Cognition*.  
1071 Psychology Press, Hove, pp. 455–467.
- 1072 Butterworth, B., Kovas, Y., 2013. Understanding Neurocognitive Developmental Disorders Can  
1073 Improve Education for All. *Science* 340, 300–305. <https://doi.org/10.1126/science.1231022>
- 1074 Butterworth, B., Varma, S., Laurillard, D., 2011. Dyscalculia: From Brain to Education. *Science* 332,  
1075 1049–1053. <https://doi.org/10.1126/science.1201536>
- 1076 Cantlon, J.F., Brannon, E.M., Carter, E.J., Pelphrey, K.A., 2006. Functional Imaging of Numerical  
1077 Processing in Adults and 4-y-Old Children. *PLoS Biol.* 4, e125.  
1078 <https://doi.org/10.1371/journal.pbio.0040125>
- 1079 Cappelletti, M., Chamberlain, R., Freeman, E.D., Kanai, R., Butterworth, B., Price, C.J., Rees, G., 2014a.  
1080 Commonalities for Numerical and Continuous Quantity Skills at Temporo-parietal Junction. *J.*  
1081 *Cogn. Neurosci.* 26, 986–999. [https://doi.org/10.1162/jocn\\_a\\_00546](https://doi.org/10.1162/jocn_a_00546)

- 1082 Cappelletti, M., Didino, D., Stoianov, I., Zorzi, M., 2014b. Number skills are maintained in healthy  
1083 ageing. *Cognit. Psychol.* 69, 25–45. <https://doi.org/10.1016/j.cogpsych.2013.11.004>
- 1084 Cappelletti, M., Price, C.J., 2014. Residual number processing in dyscalculia. *NeuroImage Clin.* 4, 18–  
1085 28. <https://doi.org/10.1016/j.nicl.2013.10.004>
- 1086 Castaldi, E., Aagten-Murphy, D., Tosetti, M., Burr, D., Morrone, M.C., 2016. Effects of adaptation on  
1087 numerosity decoding in the human brain. *NeuroImage*.  
1088 <https://doi.org/10.1016/j.neuroimage.2016.09.020>
- 1089 Chen, Q., Li, J., 2014. Association between individual differences in non-symbolic number acuity and  
1090 math performance: A meta-analysis. *Acta Psychol. (Amst.)* 148, 163–172.  
1091 <https://doi.org/10.1016/j.actpsy.2014.01.016>
- 1092 Chong, S.C., Treisman, A., 2005. Statistical processing: computing the average size in perceptual  
1093 groups. *Vision Res.* 45, 891–900. <https://doi.org/10.1016/j.visres.2004.10.004>
- 1094 Chong, S.C., Treisman, A., 2003. Representation of statistical properties. *Vision Res.* 43, 393–404.
- 1095 Cicchini, G.M., Anobile, G., Burr, D.C., 2016. Spontaneous perception of numerosity in humans. *Nat.*  
1096 *Commun.* 7, 12536. <https://doi.org/10.1038/ncomms12536>
- 1097 Collins, E., Park, J., Behrmann, M., 2017. Numerosity representation is encoded in human subcortex.  
1098 *Proc. Natl. Acad. Sci.* 114, E2806–E2815.
- 1099 Corbett, J.E., Wurnitsch, N., Schwartz, A., Whitney, D., 2012. An aftereffect of adaptation to mean  
1100 size. *Vis. Cogn.* 20, 211–231. <https://doi.org/10.1080/13506285.2012.657261>
- 1101 Cordes, S., Brannon, E.M., 2011. Attending to One of Many: When Infants are Surprisingly Poor at  
1102 Discriminating an Item’s Size. *Front. Psychol.* 2. <https://doi.org/10.3389/fpsyg.2011.00065>
- 1103 Cragg, L., Gilmore, C., 2014. Skills underlying mathematics: The role of executive function in the  
1104 development of mathematics proficiency. *Trends Neurosci. Educ.* 3, 63–68.  
1105 <https://doi.org/10.1016/j.tine.2013.12.001>
- 1106 Dakin, S.C., Tibber, M.S., Greenwood, J.A., Kingdom, F.A.A., Morgan, M.J., 2011. A common visual  
1107 metric for approximate number and density. *Proc. Natl. Acad. Sci.* 108, 19552–19557.  
1108 <https://doi.org/10.1073/pnas.1113195108>
- 1109 de Hevia, M.D., Castaldi, E., Streri, A., Eger, E., Izard, V., 2017. Perceiving numerosity from birth.  
1110 *Behav. Brain Sci.*
- 1111 De Visscher, A., Noël, M.P., Pesenti, M., Dormal, V., 2017. Developmental Dyscalculia in Adults:  
1112 Beyond Numerical Magnitude Impairment. *J. Learn. Disabil.* 1– 12.
- 1113 Dehaene, S., 1997. *The number sense: how the mind creates mathematics*. Oxford University Press,  
1114 New York.
- 1115 Dehaene, S., Piazza, M., Pinel, P., Cohen, L., 2003. THREE PARIETAL CIRCUITS FOR NUMBER  
1116 PROCESSING. *Cogn. Neuropsychol.* 20, 487–506.  
1117 <https://doi.org/10.1080/02643290244000239>
- 1118 DeWind, N.K., Adams, G.K., Platt, M.L., Brannon, E.M., 2015. Modeling the approximate number  
1119 system to quantify the contribution of visual stimulus features. *Cognition* 142, 247–265.  
1120 <https://doi.org/10.1016/j.cognition.2015.05.016>
- 1121 Eger, E., Michel, V., Thirion, B., Amadon, A., Dehaene, S., Kleinschmidt, A., 2009. Deciphering Cortical  
1122 Number Coding from Human Brain Activity Patterns. *Curr. Biol.* 19, 1608–1615.  
1123 <https://doi.org/10.1016/j.cub.2009.08.047>
- 1124 Ferrigno, S., Jara-Ettinger, J., Piantadosi, S.T., Cantlon, J.F., 2017. Universal and uniquely human  
1125 factors in spontaneous number perception. *Nat. Commun.* 8, 13968.  
1126 <https://doi.org/10.1038/ncomms13968>
- 1127 Fias, W., 2016. Neurocognitive Components of Mathematical Skills and Dyscalculia, in: *Development*  
1128 *of Mathematical Cognition*. Elsevier, pp. 195–217. <https://doi.org/10.1016/B978-0-12-801871-2.00008-3>
- 1129 Fias, W., Menon, V., Szucs, D., 2013. Multiple components of developmental dyscalculia. *Trends*  
1130 *Neurosci. Educ.* 2, 43–47.
- 1131 Fornaciai, M., Brannon, E.M., Woldorff, M.G., Park, J., 2017. Numerosity processing in early visual  
1132 cortex. *NeuroImage* 157, 429–438. <https://doi.org/10.1016/j.neuroimage.2017.05.069>
- 1133



- 1134 Fuhs, M.W., McNeil, N.M., 2013. ANS acuity and mathematics ability in preschoolers from low-  
1135 income homes: contributions of inhibitory control. *Dev. Sci.* 16, 136–148.  
1136 <https://doi.org/10.1111/desc.12013>
- 1137 Geary, D.C., Moore, A.M., 2016. Cognitive and brain systems underlying early mathematical  
1138 development, in: *Progress in Brain Research*. Elsevier, pp. 75–103.  
1139 <https://doi.org/10.1016/bs.pbr.2016.03.008>
- 1140 Gebuis, T., Cohen Kadosh, R., de Haan, E., Henik, A., 2009. Automatic quantity processing in 5-year  
1141 olds and adults. *Cogn. Process.* 10, 133–142. <https://doi.org/10.1007/s10339-008-0219-x>
- 1142 Gebuis, T., Reynvoet, B., 2012a. The interplay between nonsymbolic number and its continuous  
1143 visual properties. *J. Exp. Psychol. Gen.* 141, 642–648. <https://doi.org/10.1037/a0026218>
- 1144 Gebuis, T., Reynvoet, B., 2012b. The Role of Visual Information in Numerosity Estimation. *PLoS ONE*  
1145 7, e37426. <https://doi.org/10.1371/journal.pone.0037426>
- 1146 Gebuis, T., Reynvoet, B., 2011. Generating nonsymbolic number stimuli. *Behav. Res. Methods* 43,  
1147 981–986. <https://doi.org/10.3758/s13428-011-0097-5>
- 1148 Gilaie-Dotan, S., Capelletti, M., Rees, G., Butterworth, B., 2014. Impaired Numerical Ability Affects  
1149 Supra-Second Time Estimation. *Timing Time Percept.* 2, 169–187.  
1150 <https://doi.org/10.1163/22134468-00002026>
- 1151 Gilmore, C., Attridge, N., Clayton, S., Cragg, L., Johnson, S., Marlow, N., Simms, V., Inglis, M., 2013.  
1152 Individual Differences in Inhibitory Control, Not Non-Verbal Number Acuity, Correlate with  
1153 Mathematics Achievement. *PLoS ONE* 8, e67374.  
1154 <https://doi.org/10.1371/journal.pone.0067374>
- 1155 Ginsburg, N., Nicholls, A., 1988. Perceived numerosity as a function of item size. *Percept. Mot. Skills*  
1156 67, 656–658.
- 1157 Halberda, J., Mazocco, M.M.M., Feigenson, L., 2008. Individual differences in non-verbal number  
1158 acuity correlate with maths achievement. *Nature* 455, 665–668.  
1159 <https://doi.org/10.1038/nature07246>
- 1160 Harvey, B.M., Dumoulin, S.O., 2017. Can responses to basic non-numerical visual features explain  
1161 neural numerosity responses? *NeuroImage* 149, 200–209.  
1162 <https://doi.org/10.1016/j.neuroimage.2017.02.012>
- 1163 Harvey, B.M., Klein, B.P., Petridou, N., Dumoulin, S.O., 2013. Topographic Representation of  
1164 Numerosity in the Human Parietal Cortex. *Science* 341, 1123–1126.  
1165 <https://doi.org/10.1126/science.1239052>
- 1166 Houdé, O., Tzourio-Mazoyer, N., 2003. Neural foundations of logical and mathematical cognition.  
1167 *Nat. Rev. Neurosci.* 4, 507–514.
- 1168 Hurewitz, F., Gelman, R., Schnitzer, B., 2006. Sometimes area counts more than number. *Proc. Natl.*  
1169 *Acad. Sci.* 103, 19599–19604.
- 1170 Im, H.Y., Halberda, J., 2013. The effects of sampling and internal noise on the representation of  
1171 ensemble average size. *Atten. Percept. Psychophys.* 75, 278–286.  
1172 <https://doi.org/10.3758/s13414-012-0399-4>
- 1173 Luculano, T., Tang, J., Hall, C.W.B., Butterworth, B., 2008. Core information processing deficits in  
1174 developmental dyscalculia and low numeracy. *Dev. Sci.* 11, 669–680.  
1175 <https://doi.org/10.1111/j.1467-7687.2008.00716.x>
- 1176 Izard, V., Dehaene-Lambertz, G., Dehaene, S., 2008. Distinct cerebral pathways for object identity and  
1177 number in human infants. *PLoS Biol.* 6, e11.
- 1178 Keller, L., Libertus, M., 2015. Inhibitory control may not explain the link between approximation and  
1179 math abilities in kindergarteners from middle class families. *Front. Psychol.* 6.  
1180 <https://doi.org/10.3389/fpsyg.2015.00685>
- 1181 Landerl, K., Bevan, A., Butterworth, B., 2004. Developmental dyscalculia and basic numerical  
1182 capacities: a study of 8–9-year-old students. *Cognition* 93, 99–125.  
1183 <https://doi.org/10.1016/j.cognition.2003.11.004>
- 1184 Lefavrais, P., 1967. *Test de l'Alouette*, 2nd Edn. Paris: Editions du Centre de Psychologie Appliquée.  
1185 ed.

- 1186 Leibovich, T., Katzin, N., Harel, M., Henik, A., 2016a. From “sense of number” to “sense of  
1187 magnitude”—The role of continuous magnitudes in numerical cognition. *Behav Brain Sci.*  
1188 Leibovich, T., Vogel, S.E., Henik, A., Ansari, D., 2016b. Asymmetric Processing of Numerical and  
1189 Nonnumerical Magnitudes in the Brain: An fMRI Study. *J. Cogn. Neurosci.* 28, 166–176.  
1190 [https://doi.org/10.1162/jocn\\_a\\_00887](https://doi.org/10.1162/jocn_a_00887)  
1191 Libertus, M.E., Feigenson, L., Halberda, J., 2013. Is approximate number precision a stable predictor  
1192 of math ability? *Learn. Individ. Differ.* 25, 126–133.  
1193 Libertus, M.E., Feigenson, L., Halberda, J., 2011. Preschool acuity of the approximate number system  
1194 correlates with school math ability: Approximate number system and math abilities. *Dev. Sci.*  
1195 14, 1292–1300. <https://doi.org/10.1111/j.1467-7687.2011.01080.x>  
1196 Libertus, M.E., Starr, A., Brannon, E.M., 2014. Number trumps area for 7-month-old infants. *Dev.*  
1197 *Psychol.* 50, 108–112. <https://doi.org/10.1037/a0032986>  
1198 Linzarini, A., Houdé, O., Borst, G., 2015. When Stroop helps Piaget: An inter-task positive priming  
1199 paradigm in 9-year-old children. *J. Exp. Child Psychol.* 139, 71–82.  
1200 <https://doi.org/10.1016/j.jecp.2015.05.010>  
1201 Lourenco, S.F., Bonny, J.W., Schwartz, B.L., 2016. Children and Adults Use Physical Size and Numerical  
1202 Alliances in Third-Party Judgments of Dominance. *Front. Psychol.* 6.  
1203 <https://doi.org/10.3389/fpsyg.2015.02050>  
1204 Mazzocco, M.M.M., Feigenson, L., Halberda, J., 2011. Impaired Acuity of the Approximate Number  
1205 System Underlies Mathematical Learning Disability (Dyscalculia): Impaired Numerical Acuity  
1206 Contributes to MLD. *Child Dev.* 82, 1224–1237. <https://doi.org/10.1111/j.1467-8624.2011.01608.x>  
1207  
1208 Mejias, S., Grégoire, J., Noël, M.-P., 2012. Numerical estimation in adults with and without  
1209 developmental dyscalculia. *Learn. Individ. Differ.* 22, 164–170.  
1210 <https://doi.org/10.1016/j.lindif.2011.09.013>  
1211 Menon, V., 2016. Memory and cognitive control circuits in mathematical cognition and learning, in:  
1212 *Progress in Brain Research.* Elsevier, pp. 159–186.  
1213 <https://doi.org/10.1016/bs.pbr.2016.04.026>  
1214 Nieder, A., 2016. The neuronal code for number. *Nat. Rev. Neurosci.* 17, 366–382.  
1215 <https://doi.org/10.1038/nrn.2016.40>  
1216 Nieder, A., Freedman, D. J., Miller, E. K., 2002. Representation of the quantity of visual items in the  
1217 primate prefrontal cortex. *Science* 297, 1708–1711.  
1218 Nieder, A., Merten, K., 2007. A Labeled-Line Code for Small and Large Numerosities in the Monkey  
1219 Prefrontal Cortex. *J. Neurosci.* 27, 5986–5993. <https://doi.org/10.1523/JNEUROSCI.1056-07.2007>  
1220  
1221 Nieder, A., Miller, E.K., 2004. A parieto-frontal network for visual numerical information in the  
1222 monkey. *Proc. Natl. Acad. Sci. U. S. A.* 101, 7457–7462.  
1223 Noël, M.P., Grégoire, J., 2015. TEDI-MATH Grands: test diagnostique des compétences de base en  
1224 mathématiques du CE2 à la 5e. Pearson.  
1225 Nys, J., Content, A., 2012. Judgement of discrete and continuous quantity in adults: Number counts!  
1226 *Q. J. Exp. Psychol.* 65, 675–690. <https://doi.org/10.1080/17470218.2011.619661>  
1227 Piazza, M., Eger, E., 2016. Neural foundations and functional specificity of number representations.  
1228 *Neuropsychologia* 83, 257–273. <https://doi.org/10.1016/j.neuropsychologia.2015.09.025>  
1229 Piazza, M., Facoetti, A., Trussardi, A.N., Berteletti, I., Conte, S., Lucangeli, D., Dehaene, S., Zorzi, M.,  
1230 2010. Developmental trajectory of number acuity reveals a severe impairment in  
1231 developmental dyscalculia. *Cognition* 116, 33–41.  
1232 <https://doi.org/10.1016/j.cognition.2010.03.012>  
1233 Piazza, M., Izard, V., Pinel, P., Le Bihan, D., Dehaene, S., 2004. Tuning curves for approximate  
1234 numerosity in the human intraparietal sulcus. *Neuron* 44, 547–555.  
1235 Piazza, M., Pica, P., Izard, V., Spelke, E.S., Dehaene, S., 2013. Education Enhances the Acuity of the  
1236 Nonverbal Approximate Number System. *Psychol. Sci.* 24, 1037–1043.  
1237 <https://doi.org/10.1177/0956797612464057>

- 1238 Poirel, N., Borst, G., Simon, G., Rossi, S., Cassotti, M., Pineau, A., Houdé, O., 2012. Number  
1239 Conservation is Related to Children's Prefrontal Inhibitory Control: An fMRI Study of a  
1240 Piagetian Task. *PLoS ONE* 7, e40802. <https://doi.org/10.1371/journal.pone.0040802>  
1241 Ross, J., 2010. Vision senses number directly. *J. Vis.* 10, 1–8. <https://doi.org/10.1167/10.2.10>  
1242 Ross, J., 2003. Visual discrimination of number without counting. *Perception* 32, 867–870.  
1243 <https://doi.org/10.1068/p5029>  
1244 Rousselle, L., Noël, M.-P., 2008. The development of automatic numerosity processing in  
1245 preschoolers: Evidence for numerosity-perceptual interference. *Dev. Psychol.* 44, 544–560.  
1246 <https://doi.org/10.1037/0012-1649.44.2.544>  
1247 Rousselle, L., Noël, M.-P., 2007. Basic numerical skills in children with mathematics learning  
1248 disabilities: A comparison of symbolic vs non-symbolic number magnitude processing.  
1249 *Cognition* 102, 361–395. <https://doi.org/10.1016/j.cognition.2006.01.005>  
1250 Rousselle, L., Palmers, E., Noël, M.-P., 2004. Magnitude comparison in preschoolers: what counts?  
1251 Influence of perceptual variables. *J. Exp. Child Psychol.* 87, 57–84.  
1252 <https://doi.org/10.1016/j.jecp.2003.10.005>  
1253 Salti, M., Katzin, N., Katzin, D., Leibovich, T., Henik, A., 2016. One tamed at a time: A new approach  
1254 for controlling continuous magnitudes in numerical comparison tasks. *Behav. Res. Methods.*  
1255 <https://doi.org/10.3758/s13428-016-0772-7>  
1256 Sophian, C., Chu, Y., 2008. How do people apprehend large numerosities? *Cognition* 107, 460–478.  
1257 <https://doi.org/10.1016/j.cognition.2007.10.009>  
1258 Stoianov, I., Zorzi, M., 2017. Computational foundations of the visual number sense. *Behav. Brain Sci.*  
1259 Sweeny, T.D., Wurnitsch, N., Gopnik, A., Whitney, D., 2015. Ensemble perception of size in 4-5-year-  
1260 old children. *Dev. Sci.* 18, 556–568. <https://doi.org/10.1111/desc.12239>  
1261 Szűcs, D., Devine, A., Soltesz, F., Nobes, A., Gabriel, F., 2013. Developmental dyscalculia is related to  
1262 visuo-spatial memory and inhibition impairment. *Cortex* 49, 2674–2688.  
1263 <https://doi.org/10.1016/j.cortex.2013.06.007>  
1264 Szűcs, Dénes, Nobes, A., Devine, A., Gabriel, F.C., Gebuis, T., 2013. Visual stimulus parameters  
1265 seriously compromise the measurement of approximate number system acuity and  
1266 comparative effects between adults and children. *Front. Psychol.* 4.  
1267 <https://doi.org/10.3389/fpsyg.2013.00444>  
1268 Tibber, M.S., Greenwood, J.A., Dakin, S.C., 2012. Number and density discrimination rely on a  
1269 common metric: Similar psychophysical effects of size, contrast, and divided attention. *J. Vis.*  
1270 12, 8–8. <https://doi.org/10.1167/12.6.8>  
1271 Tokita, M., Ishiguchi, A., 2010. How might the discrepancy in the effects of perceptual variables on  
1272 numerosity judgment be reconciled? *Atten. Percept. Psychophys.* 72, 1839–1853.  
1273 <https://doi.org/10.3758/APP.72.7.1839>  
1274 Vanbinst, K., De Smedt, B., 2016. Individual differences in children's mathematics achievement, in:  
1275 *Progress in Brain Research*. Elsevier, pp. 105–130.  
1276 <https://doi.org/10.1016/bs.pbr.2016.04.001>  
1277 Vanbinst, K., Ghesquière, P., De Smedt, B., 2014. Arithmetic strategy development and its domain-  
1278 specific and domain-general cognitive correlates: A longitudinal study in children with  
1279 persistent mathematical learning difficulties. *Res. Dev. Disabil.* 35, 3001–3013.  
1280 <https://doi.org/10.1016/j.ridd.2014.06.023>  
1281 Xu, F., 2003. Numerosity discrimination in infants: Evidence for two systems of representations.  
1282 *Cognition* 89, B15–B25. [https://doi.org/10.1016/S0010-0277\(03\)00050-7](https://doi.org/10.1016/S0010-0277(03)00050-7)  
1283 Xu, F., Spelke, E.S., 2000. Large number discrimination in 6-month-old infants. *Cognition* 74, B1–B11.  
1284
